## The allosteric modulation of Complement C5 by knob domain peptides

Alex Macpherson<sup>1,2\*</sup>, Maisem Laabei<sup>2</sup>, Zainab Ahdash<sup>1</sup>, Melissa Graewert<sup>3</sup>, James R. Birtley<sup>1</sup>, Sarah Schulze<sup>1</sup>, Susan Crennell<sup>2</sup>, Sarah A. Robinson<sup>4</sup>, Ben Holmes<sup>1</sup>, Vladas Oleinikovas<sup>1</sup>, Per H. Nilsson<sup>5,6</sup>, James Snowden<sup>1</sup>, Victoria Ellis<sup>1</sup>, Tom Eirik Mollnes<sup>6,7,8</sup>, Charlotte M. Deane<sup>4</sup>, Dmitri Svergun<sup>3</sup>, Alastair D.G. Lawson<sup>1</sup> and Jean van den Elsen<sup>2,9\*</sup>

<sup>1</sup> UCB, Slough, UK. SL1 3WE;

<sup>2</sup> Department of Biology and Biochemistry, University of Bath, Bath, UK. BA2 7AX;

<sup>3</sup> European Molecular Biology Laboratory, Hamburg Unit, 22607 Hamburg, Germany;

<sup>4</sup> Department of Statistics, University of Oxford, Oxford, UK;

<sup>5</sup> Department of Chemistry and Biomedicine, Linnaeus University, 391 82 Kalmar, Sweden;

<sup>6</sup> Department of Immunology, Oslo University Hospital, University of Oslo, Oslo, Norway;

<sup>7</sup> Research Laboratory, Bodø Hospital, K.G. Jebsen TREC, University of Tromsø, Tromsø, Norway;

<sup>8</sup> Centre of Molecular Inflammation Research, Norwegian University of Science and Technology, Trondheim, Norway;

<sup>9</sup> Centre for Therapeutic Innovation, University of Bath, Bath, UK. BA2 7AX

\*email [alex.macpherson@ucb.com](mailto:alex.macpherson@ucb.com) and [bssjmhve@bath.ac.uk](mailto:bssjmhve@bath.ac.uk)

**To overcome limited germline combinatorial diversity, bovines have evolved a subset of antibodies with ultra-long CDRH3 regions that harbour cysteine-rich knob domains. To produce affinity-matured peptides, we previously isolated autonomous 3-6 kDa knob domains from bovine antibodies. Here, we show that binding of four knob domain peptides elicits a range of effects on the clinically validated drug target complement C5. Allosteric mechanisms predominated, with one peptide selectively inhibiting C5 cleavage by the alternative pathway C5 convertase, revealing a targetable mechanistic difference between the classical and alternative pathway C5 convertases. Taking a hybrid biophysical approach, we present C5-knob domain co-crystal structures and, by solution methods, observed allosteric effects propagating >50 Å from the binding sites. This study expands the therapeutic scope of C5, presents new inhibitors and introduces knob domains as new, low molecular weight antibody fragments, with therapeutic potential.**

- 1 By the end of 2019, over 60 peptide drugs have received regulatory approval, with an
- 2 estimated 400 more in active development globally (Lau and Dunn, 2018; Lee *et al.*, 2019).

3 As a potential route to discover therapeutic peptides, we previously reported a method for  
4 deriving peptides from the ultralong heavy chain complementarity determining region 3 (ul-  
5 CDRH3), which are unique to a subset of bovine antibodies(Macpherson *et al.*, 2020). We  
6 have shown that knob domains, a cysteine-rich mini-domain common to all ul-CDRH3, can  
7 bind antigen autonomously when removed from the antibody scaffold(Macpherson *et al.*,  
8 2020). This allows peptide affinity maturation to be performed *in vivo*, harnessing the cow's  
9 immune system to produce peptides with complex stabilising networks of disulphide bonds.

10 For the discovery of knob domain peptides, immunisation of cattle is followed by cell sorting  
11 of B-cells using fluorescently labelled antigen. A library of antigen-specific CDRH3  
12 sequences is created by performing a reverse transcription polymerase chain reaction (RT  
13 PCR) on the B-cell lysate, followed by a polymerase chain reaction (PCR) using primers  
14 specific to the conserved framework regions which flank CDRH3(Macpherson *et al.*, 2020).  
15 Upon sequencing, ul-CDRH3 are immediately evident and the knob domains can be  
16 expressed recombinantly as cleavable fusion proteins(Macpherson *et al.*, 2020).

17 This method for discovery of knob domain peptides was established using Complement  
18 component C5, and we reported peptides which bound C5 with affinities in the pM - low nM  
19 range(Macpherson *et al.*, 2020). Herein, we use these novel peptides to probe the structural  
20 and functional aspects of C5 activation.

21 C5 is the éminence grise of the complement cascade's druggable proteins, and the target of  
22 effective therapies for diseases with pathogenic complement dysregulation, of which  
23 paroxysmal nocturnal haemoglobinuria(Rother *et al.*, 2007) and atypical haemolytic uremic  
24 syndrome(Nurnberger *et al.*, 2009) are notable examples. Six monoclonal antibodies  
25 targeting C5 have reached, or are entering, clinical trials, closely followed by C5-targeting  
26 immune evasion molecules(Romay-Penabad *et al.*, 2014), aptamers(Biesecker *et al.*, 1999),  
27 cyclic peptides(Ricardo *et al.*, 2014), interfering RNA(Borodovsky *et al.*, 2014), and small  
28 molecules(Jendza *et al.*, 2019). Currently, C5 inhibitors are being trialled for the treatment of  
29 acute respiratory distress syndrome arising from SARS-CoV-2 infection(Smith *et al.*, 2020;  
30 Wilkinson *et al.*, 2020; Zelek *et al.*, 2020).

31 C5 is the principal effector of the terminal portion of the complement cascade. At high local  
32 C3b concentrations, arising from activation of either or both of the classical (CP) and  
33 mannose binding lectin (LP) pathways, aided by the amplificatory alternative pathway (AP),  
34 C5 is cleaved into two moieties with distinct biological functions. Cleavage is performed by

35 two convertases; C4bC2aC3b, formed in response to CP or MBL activation (henceforth the  
36 CP C5 convertase), and C3bBbC3b, formed in response to AP activation (henceforth the AP  
37 C5 convertase). Although the constitutive components of the C5 convertases differ, they are  
38 thought to be mechanistically identical. Once cleaved, the C5a fragment is the most  
39 proinflammatory anaphylatoxin derived from the complement cascade. When signalling  
40 through C5aR1 and C5aR2, C5a is a strong chemoattractant recruiting neutrophils,  
41 eosinophils, monocytes, and T lymphocytes to sites of complement activation, whereupon it  
42 activates phagocytic cells, prompting degranulation. C5b meanwhile, interacts with C6,  
43 recruiting C7-C9 to form the terminal C5b-9 complement complex (TCC). Once inserted into  
44 a cell membrane, the TCC is referred to as the membrane attack complex, a membrane-  
45 spanning pore which can lyse sensitive cells.

46 Aspects of the structural biology of C5 are well understood, due to a crystal structure of the  
47 apo form (Fredslund *et al.*, 2008) and a number of co-crystal structures of C5 with various  
48 modulators. By virtue of its constitutive role in the terminal pathway, C5 is a recurrent target  
49 for immune evasion molecules and structures have been solved of C5 in complex with an  
50 inhibitory molecule derived from *Staphylococcus aureus*, SSL-7 (Laursen *et al.*, 2010), as  
51 well as several structurally distinct examples from ticks: OmCI (Jore *et al.*, 2016), RaCI (Jore  
52 *et al.*, 2016) and Cirp-T (Reichhardt *et al.*, 2020). Additionally, the structures of C5 with the  
53 inhibitory monoclonal antibody (mAb) eculizumab (Schatz-Jakobsen *et al.*, 2016), of C5 with  
54 a small molecule inhibitor (Jendza *et al.*, 2019), and of C5 with the complement depleting  
55 agent Cobra Venom Factor (CVF) (Laursen *et al.*, 2011), have all been determined.

56 Here, we probe C5 with knob domain peptides and explore the molecular processes which  
57 underpin allosteric modulation of this important drug target. This study is the first to  
58 investigate the molecular mechanisms and pharmacology of this recently isolated class of  
59 peptide.

## 60 **Results**

61 **Functional characterisation of anti-C5 bovine knob domain peptides.** Complement  
62 activation assays were performed, using two ELISA kits which measured CP and AP  
63 activation in human serum, through C5b neo-epitope formation and C5a release. Orthogonal  
64 ELISA assays, which measured C3b and C9 deposition, were also developed (Figure 1, a-b).  
65 We tested four knob domain peptides: K8, K57, K92 and K149, which have been previously  
66 reported to display tight binding to C5 (Macpherson *et al.*, 2020).

67 By ELISA, K57 was a potent and fully efficacious inhibitor of C5 activation, preventing  
68 release of C5a, and deposition of C5b and C9. As expected, there was no effect on C3b,  
69 which is upstream of C5. In contrast, K149 was a high affinity silent binder with no  
70 discernible effect on C5a release, formation of C5b neo-epitope or C9 deposition, even at  
71 peptide concentrations in excess of 100 x  $K_D$  (Supplementary Section 1).

72 K8 and K92 exerted more nuanced allosteric effects on C5. By ELISA, K92 partially  
73 prevented C5 activation by the AP but, intriguingly, no effect was observed in assays where  
74 the AP component was not isolated, suggesting K92 selectively inhibits C5 activation by the  
75 AP C5 convertase. Partial antagonists, where the degree of inhibition for the asymptotic  
76 concentrations of a dose response curve ( $E_{max}$ ) is below 100 %, are an impossible mode of  
77 pharmacology for orthosteric antagonists (Klein, Vinson and Niswender, 2013) and we  
78 therefore propose that K92 operates by a non-steric mechanism. K8 was also demonstrably  
79 allosteric, partially inhibiting both the AP and CP in ELISA experiments. For K8 and K92, no  
80 effect on C3b deposition was detected.

81 When tested in CP and AP haemolysis assays, K57 was a potent and fully efficacious  
82 inhibitor of complement mediated cell lysis. Consistent with the ELISA data, K92 was active  
83 solely in the AP-driven haemolysis assay, achieving  $E_{max}$  values of 30-40 %; while K8 was  
84 efficacious in the CP assay but did not show activity in the AP assay below 10  $\mu$ M,  
85 potentially a consequence of the increased serum concentration and stringency of the  
86 haemolysis endpoint.

87 **Crystal structure of the C5-K8 peptide complex.** To elucidate the structural basis for the  
88 allosteric modulation of C5, we determined the crystal structure of the C5-K8 complex at a  
89 resolution of 2.3 Å (Supplementary 2.1 shows data collection and structure refinement  
90 statistics). The structure of the C5-K8 complex shows the K8 peptide binding to a previously  
91 unrecognised regulatory site on C5; the macroglobulin (MG) 8 domain of the  $\alpha$ -chain (Figure  
92 2a-b). K8 adopts a cysteine knot configuration, where a flattened 3-strand  $\beta$ -sheet topology  
93 is constrained by three disulphide bonds (Figure 3 and Supplementary 2.5). Analysis of the  
94 K8-C5 complex with the macromolecular interfaces analysis tool PDBePISA (Krissinel and  
95 Henrick, 2007), reveals a large interaction surface (comprising 1639Å<sup>2</sup>; 849Å<sup>2</sup> contributed by  
96 K8 and 790Å<sup>2</sup> by C5), comparable to those seen in Fab-antigen complexes, stabilised by an  
97 extensive network of 18 hydrogen bonds between K8 and the MG8 domain (Supplementary  
98 2.6), dominated by arginine residues R23<sub>K8</sub>, R32<sub>K8</sub> and R45<sub>K8</sub>. The extensive H-bond

99 network is further bolstered by ionic interactions, between R32<sub>K8</sub> and D1471<sub>C5</sub> (C5  
100 numbering based on mature sequence), D25<sub>K8</sub> and K1409<sub>C5</sub>, and H36<sub>K8</sub> and D1382<sub>C5</sub>  
101 (Supplementary 2.7). The opposing face of K8 was fortuitously stabilised by a substantial,  
102 1275.1 Å<sup>2</sup>, crystal contact with the C5d domain of a symmetry-related C5 molecule,  
103 (Supplementary 2.2), ensuring clear electron density and clearly enunciating the disulphide  
104 bond arrangement and backbone and side chains interactions. A mFo-DFc simulated  
105 annealing omit map of the C5-K8 complex is displayed in Supplementary 2.4, showing clear  
106 electron density for the K8 peptide. Despite the overall resolution of the dataset comparing  
107 favourably with other C5 structures in the PDB (Schatz-Jakobsen *et al.*, 2016; Laursen *et al.*,  
108 2010; Jore *et al.*, 2016; Fredslund *et al.*, 2008), density for the C345C domain was largely  
109 absent, due to this flexible domain occupying a solvent channel.

110 **Crystal structure of the C5-K92 complex.** We also present a crystal structure of the C5-  
111 K92 complex at a resolution of 2.75 Å (Supplementary 2.1 shows data collection and  
112 structure refinement statistics). Continuous electron density for the flexible C345C domain of  
113 C5 was observed, due to it being stabilised in an upward pose by crystal contacts, akin to the  
114 C5-RaCI-OmCI ternary complex structures (Protein Data Bank [PDB] accession codes:  
115 5HCC, 5HCD and 5HCE (Jore *et al.*, 2016)). Despite being higher affinity than K8, density  
116 for K92 was not as well defined and so, to aid model building, we used mass spectrometry to  
117 perform a disulphide mapping experiment. The disulphide map of K92 identified formation  
118 of disulphide bonds between C9<sub>K92</sub> and C23<sub>K92</sub> and between C2<sub>K92</sub> and C18<sub>K92</sub>  
119 (Supplementary 2.8), enabling completion of the model. A mFo-DFc simulated annealing  
120 omit map of the C5-K92 complex is displayed in Supplementary 2.4, showing clear electron  
121 density for the peptide.

122 Similar to K8, K92 adopts a 3-strand β-sheet topology (Figure 2 c-d and Supplementary 2.9)  
123 but with only two disulphide bonds. With shorter β-strands and longer connecting loop  
124 regions, K92 exhibits a more compact, globular arrangement (Figure 3b). Two extended loop  
125 regions interact with C5, including an α-helix containing loop between β-strands 1 and 2,  
126 occupying a cleft between the MG1 and MG5 domains of the β-chain of C5. The 1365 Å<sup>2</sup>  
127 interaction surface is sustained via a sparse set of eight H-bonds (Supplementary 2.10). An  
128 elegant series of π-π and aliphatic–aromatic stacking interactions spans K92, encompassing:  
129 F26<sub>K92</sub>, H25<sub>K92</sub>, W21<sub>K92</sub>, W6<sub>K92</sub> and P3<sub>K92</sub>, (Supplementary 2.11). From within this  
130 hydrophobic patch, important H-bonds occur between H25<sub>K92</sub> and the backbone carbonyls of  
131 N77<sub>C5</sub> and N81<sub>C5</sub> on the MG1 domain.

132 The epitope for K92 is entirely contained within the binding interface of a previously  
133 reported immune evasion molecule, the 23 kDa SSL7 protein from *Staphylococcus aureus*.  
134 The C5-SSL7 crystal structure reveals the core of that interaction to be a series of five H-  
135 bonds between SSL7 and a region of  $\beta$ -sheet on the MG5 domain, spanning H511<sub>C5</sub>-E516<sub>C5</sub>  
136 (Laursen *et al.*, 2010). Our structure shows that K92 also interacts with this area, inducing a re-  
137 orientation of the sidechain of H511<sub>C5</sub> and forming a backbone H-bond with F510<sub>C5</sub>, but  
138 critically also makes interactions with the MG1 domain, effectively cross-linking the MG1  
139 and MG5 domains. These changes beget different allosteric effects; SSL7, either in isolation  
140 or in complex with its second ligand IgA, is full, or occasional partial, antagonist of both the  
141 AP and CP(Bestebroer *et al.*, 2010; Laursen *et al.*, 2010), while K92 is a selective partial  
142 antagonist of the AP.

143 **The multi-purpose role of disulphide bonds.** In the near absence of secondary structure,  
144 disulphide bonds are sources of stability for both peptides. For K92, both the backbone amide  
145 and carbonyl of C23<sub>K92</sub> participate in H-bonds with the sidechain of S82<sub>C5</sub>, with close  
146 proximity to the electron dense disulphide bond lowering the conformational and desolvation  
147 entropy of these polar interactions. Within the knob domain paratopes, disulphide bonds also  
148 participate in sulphur- $\pi$  interactions. For K8, an interchain sulphur- $\pi$  stack between the  
149 C26<sub>K8</sub>-C40<sub>K8</sub> disulphide bond and the aromatic of Y1378<sub>C5</sub>, elegantly positions the hydroxyl  
150 group of Y1378<sub>C5</sub> to make a H-bond with D24<sub>K8</sub>. While for K92, an intra-chain sulphur- $\pi$   
151 stack between the C9<sub>K92</sub>-C23<sub>K92</sub> disulphide bond and the aromatic of Y14<sub>K92</sub> was used to  
152 orientate Y14<sub>K92</sub>, such that its hydroxyl group could participate in an interchain H- bond with  
153 N38<sub>C5</sub>.

154 Both K8 and K92 have prominent non-polar surface features (Figure 3). In addition to three  
155 disulphide bonds, K8 has several aromatic residues, F7<sub>K8</sub>, W9<sub>K8</sub>, Y11<sub>K8</sub>, F20<sub>K8</sub>, W26<sub>K8</sub>,  
156 Y29<sub>K8</sub>, Y38<sub>K8</sub>, F40<sub>K8</sub>, Y50<sub>K8</sub> and F51<sub>K8</sub>, most of which occupy the opposing face and do not  
157 participate in the paratope. Hydrophobicity may be part of a specific strategy to maximise  
158 free enthalpy from the limited set of polar interactions. So, to evaluate bond enthalpy, we  
159 performed binding pose metadynamics(Clark *et al.*, 2016), an analysis typically employed to  
160 computationally evaluate the binding stability of chemical ligands(Fusani *et al.*, 2020). This  
161 *in silico* analysis suggested that both K8 and K92's binding poses were exceptionally stable,  
162 with the interface maintaining the key interactions in spite of applied force (Supplementary  
163 2.6 and 2.7). This, in conjunction with earlier kinetic studies(Macpherson *et al.*, 2020),  
164 highlights quality of the interactions made by both knob domains.



165 **Comparison to known antibody paratopes.** Although antibody derived, K8 and K92 are  
166 structurally unique variable regions. We compared the K8 and K92 knob domains to a non-  
167 redundant set of 924 non-identical sequences of paired antibody-protein antigen structures  
168 from SAbDab(Dunbar *et al.*, 2014). Paratopes were defined as any antibody residues within  
169 4.5 Å of the antigen in the structure. The paratopes of K8 and K92 contain 18 and 10  
170 residues, respectively, which are within the typical range of antibody paratope sizes  
171 (Supplementary 2.14). Given this similarity in size, we searched for structurally and  
172 physicochemically similar antibody paratopes from the 924 antibody complexes but no  
173 similar paratope sites were found(Wong *et al.*, 2020). While the limited examples preclude  
174 firm conclusions, this lack of similarity could be due either to the unusual fold of the knob  
175 domains or to differences in paratope amino acid composition.

176 In terms of residue usage, one difference in paratope composition that is potentially universal  
177 is the presence of cysteine in the knob domains (Supplementary 2.15) which is uncommon in  
178 most antibody paratopes apart from broadly neutralising antibodies(Hutchinson *et al.*, 2019).  
179 Using Arpeggio(Jubb, 2015) to identify inter- (antigen contacting) and intra-paratope  
180 interactions revealed that on average, antibodies have 16 intra-paratope and 17 inter-paratope  
181 interactions; K8 is very close to this, with 15 intra-paratope and 17 inter-paratope  
182 interactions, whereas K92 paratope has fewer, with 9 intra-paratope and 10 inter-paratope  
183 interactions. A bovine Fab with an ul-CDRH3 was recently crystallised in complex with  
184 antigen, in this case a soluble portion of the HIV envelope(Stanfield *et al.*, 2020). While the  
185 low resolution of the crystal structure hindered analysis, a casual inspection of the paratope  
186 suggests 10 intra-paratope and 10 inter-paratope interactions are sustained by the knob  
187 domain, comparable to K92.

188 A search for structurally homologous proteins, using the DALI protein structure comparison  
189 server(Holm, 2020), did not find any 3-D structures similar to K8 or K92, including amongst  
190 the 14 structures of bovine Fabs with ul-CDRH3 in the PDB, potentially as a consequence of  
191 knob domains being shaped by their antigen.

192 **Solution techniques reveal allosteric networks.** To contextualise our functional and  
193 structural data, we analysed the C5-knob domain complexes by two solution biophysical  
194 techniques – small angle X-ray scattering (SAXS) and hydrogen deuterium exchange mass  
195 spectrometry (HDX-MS).

196 SEC-SAXS, where size exclusion chromatography (SEC) immediately precedes the solution  
197 X-ray experiment ensuring a monodispersed sample, was performed in concert with SEC-  
198 MALLS (multi angle laser light scattering). Data were collected for C5 and the C5-K8, C5-  
199 K57, C5-K92 and C5-K149 complexes. (Figure 4a-c). SEC-MALLS confirmed that the  
200 increases in molecular weight of the complexes were consistent throughout the elution peaks  
201 (Supplementary 3.1 and 3.2). Interestingly, while SEC-SAXS elution profiles gave stable  
202 estimates of the radius of gyration ( $R_G$ ) across the tip of the peak, frames from the descending  
203 elution peaks show lower  $R_G$  values, suggesting either the presence of unbound C5 in the  
204 sample, which our SEC-MALLS data would preclude, or two distinguishable conformational  
205 states.

206 Frames corresponding to the tip of the peak were averaged and submitted for full SAXS  
207 analysis. For the complexes, the scattering curves showed slight increases in both the  $R_G$  and  
208 solute volume (Supplementary 3.1), with the C5-K8 complex showing the largest change and  
209 C5-K149 the smallest change, corresponding with the absence of function and suggesting  
210 K149 binds peripherally to a conformation closely resembling apo C5. For K92 and K57, the  
211 discrepancies observed in the mid  $s$  range indicate an overall change in flexibility of C5 upon  
212 binding of these peptides, and this tuning of dynamics may contribute to their mechanism.

213 Consistent with earlier observations (Fredslund *et al.*, 2008), comparison of the apo C5  
214 experimental data with the theoretical scattering curve revealed discrepancies in the lowest  
215 angle range, indicating C5 adopts a more elongated conformation in solution than the crystal  
216 structure would suggest (Supplementary 3.3). To better approximate C5 in solution we  
217 performed a normal mode model analysis (NMA) using SREFLEX (Panjkovich and Svergun,  
218 2016) and found that elongation of the C5 model improved the  $\chi^2$  from  $>13$  to 1.55. The fit of  
219 the C5-K92 complex was also markedly improved by the NMA (Supplementary 3.3),  
220 whereby elongation and incorporation of the peptide improved the model from an initial  $\chi^2$  of  
221  $>20$ , to 2.5 (with an overall root-mean-square [RMS] of 3.8 in both cases).

222 When using the C5-K8 co-crystal structure for fitting of the C5-K8 SAXS data, the absence  
223 of the C345C domain was problematic. The generation of a hybrid model where the C345C  
224 domain was reinstated produced a poor fit ( $\chi^2 = 75$ ). Despite significant remodelling of  
225 C345C, we were unable to describe the solution structure in more detail. As the data were  
226 collected in SEC mode, it is unlikely that increases in  $R_G$  values and volume are due to  
227 oligomerisation and instead may suggest increased flexibility around the C345C linker. The



228 absence of clear electron density for the C345C domain in the crystal structure may be a  
229 consequence of K8 inducing additional flexibility to this region, which again could contribute  
230 to the efficacy of the peptide.

231 The discrepancies between the crystal structures and the solution scattering data indicate that  
232 while permitting elucidation of the molecular interaction of the epitopes, the constraints of  
233 the crystal lattice may impede the detection of more subtle, global changes, leading to  
234 underestimation of the conformational changes induced by the peptide.

235 To further explore such effects in solution, we used HDX-MS to provide molecular level  
236 information on local protein structure and dynamics. HDX-MS measures the exchange of  
237 backbone amide hydrogen to deuterium in the solvent, with the rate of HDX determined by  
238 solvent accessibility, protein flexibility, and hydrogen bonding. To interpret the impact of  
239 peptide binding on C5 structural dynamics, we performed differential HDX ( $\Delta$ HDX)  
240 analysis, comparing C5-knob domain complexes to apo C5, where shielding of C5 residues  
241 through participation in a binding interface will prevent deuteration, while conformational  
242 changes may increase or decrease deuterium uptake, in relation to the degree of solvent  
243 exposure.

244 For C5-K8, the sole protected region of C5 corresponded to the epitope on the MG8 domain  
245 (L1380<sub>C5</sub>-E1387<sub>C5</sub>), although the interface was not entirely defined (Figure 5a). Additional  
246 conformational changes were observed in the neighbouring C5d domain which becomes  
247 more solvent exposed, suggesting K8 is affecting the dynamics of this domain.

248 For the C5-K92 complex, consistent with the crystal structure, there was protection of the C5  
249 residues located in the epitope between the MG1 and MG5 domains (H70<sub>C5</sub>-L85<sub>C5</sub>), shown in  
250 Figure 5c. There were also effects distal to the K92 binding site, notably in C5d (I1169<sub>C5</sub>-  
251 F1227<sub>C5</sub>) and neighbouring CUB domain (L1303<sub>C5</sub>-L1346<sub>C5</sub>), indicating a K92-induced  
252 conformational change. Interestingly, the allosteric network can be visualised by changes in  
253 solvent exposure which propagate from the K92 epitope through MG2 domain (L126<sub>C5</sub>-  
254 V145<sub>C5</sub>) and into the C5d and CUB domains. For the C5-K57 complex, the absence of a co-  
255 crystal structure meant we had no prior knowledge of the K57 epitope. However, clear  
256 protection was observed in the MG5 domain, immediately adjacent to the K92 epitope  
257 (N483<sub>C5</sub>-L540<sub>C5</sub>), with sparse areas of increased solvent exposure located in the MG6  
258 (Q572<sub>C5</sub>-L590<sub>C5</sub>), MG8 (L1379<sub>C5</sub>-A1388<sub>C5</sub>) and C5d (K1048<sub>C5</sub>-Y1064<sub>C5</sub>) domains. A single

259 protected peptide was also present in the CUB domain (G951<sub>C5</sub>-L967<sub>C5</sub>), suggesting the K57  
260 epitope may be on either the MG5 or CUB domains.

261 The helical C5d domain is the target of two immune evasion molecules which have evolved  
262 in ticks, OmCI and RaCI, both of which inhibit C5 by crosslinking C5d to neighbouring  
263 domains(Jore *et al.*, 2016). Additionally, it has been shown that polyclonal antibodies raised  
264 against C5d inhibit binding of C5 to C3b(DiScipio, 1992). The binding site of OmCI is  
265 contained within the CUB and C5d domains, with only a single, non-bonded interaction to  
266 the C345C domain visible in the crystal structure(Jore *et al.*, 2016), which appears mediated  
267 by crystal contacts. This may suggest that K92 and K8 achieve efficacy in a manner similar  
268 to OmCI by modulating the C5d and CUB domains, but, in the case of K92, at a range of  
269 over 50 Å. Such remote effects are not unprecedented; allosteric structural changes can be  
270 propagated at over 150 Å in response to drug binding(Haselbach *et al.*, 2017). SSL7, which  
271 similarly binds the MG1-MG5 domains is also a partial antagonist, suggesting it too has an  
272 allosteric mechanism but not one which is selective for the AP.

273 There was little protection or deprotection of proteolytic fragments of the C5a domain in any  
274 of the complexes, we therefore propose that the knob domain peptides do not act by inducing  
275 conformational changes which shield the scissile arginine bond. The binding of K8, however,  
276 may induce some flexibility of C5a, as only sparse continuous electron density was observed  
277 for the N-terminal the linker extending from MG6 to this domain in the crystal structure.  
278 Taken in the context of the other changes, notably in the C5d and CUB domains, it is more  
279 probable that they affect more global changes in C5 which lower the affinity for C3b or the  
280 C5 convertases.

281 **Experimental validation of cooperativity** We hypothesised that these conformational  
282 changes may manifest as cooperativity between the different knob domain epitopes. To test  
283 this, we performed a SPR cross blocking-experiment where, using a Biacore 8K, we saturated  
284 a C5 coated sensor chip with two 20 µM injections of knob domain peptide before injecting a  
285 different peptide at 20 µM to assess its capacity to bind. Saturation of C5 with the non-  
286 functional K149 did not prevent subsequent binding of K8, K57 or K92 (Figure 6d),  
287 suggesting K149 does not share an epitope with the other ligands, nor does it significantly  
288 perturb C5 such that the other binding sites are affected.

289 We detected negative cooperativity between the distal binding sites of K8 and K92, where,  
290 somewhat surprisingly, saturation of C5 with K8 entirely prevented binding of K92. Given

291 the degree of separation between the K8 and K92 epitopes, in excess of 50 Å, and the  
292 conformational changes detected by HDX-MS analysis, we propose a non-steric mechanism  
293 whereby competition between K8 and K92 arises by negative cooperativity between the two  
294 distal epitopes. Correspondingly, when the order of addition was changed and C5 was  
295 saturated with K92, K8 was still able to bind, albeit to a lesser degree (Figure 6b). Saturation  
296 of C5 with K8 also entirely eliminated binding of K57, with a similar order of addition effect,  
297 whereby K8 could still partially bind to the C5-K57 complex (Figure 6a).

298 When C5 was saturated with K92 or K57 only very small amounts of subsequent binding of  
299 either peptide were observed by SPR (Figure 6c). Suggesting that the epitopes do not overlap  
300 but that considerable negative cooperativity exists. To further home in on the K57 binding  
301 site we measured binding to C5b in a SPR single-cycle kinetics experiment (Supplementary  
302 5.1). Upon cleavage of C5a the remaining domains of the  $\alpha$ -chain undergo a substantial  
303 conformational change, mediated by rearrangement of the MG8, CUB and C5d  
304 domains(Hadders *et al.*, 2012; Aleshin *et al.*, 2012). By SPR, K8 did not bind C5b, a likely  
305 consequence of conformational rearrangement of the CUB domain. However, K57, K92 and  
306 K149 all bound C5b with equal affinity to C5 (Supplementary 5.2). As the CUB domain is  
307 significantly altered in C5b, this increases the likelihood that, of the two protected regions  
308 identified by HDX-MS, the K57 epitope is on the MG5 domain.

309 By HDX-MS and SPR, we saw considerable long-range effects with all knob domains, with  
310 the exception of non-functional K149. We therefore suggest that knob domain peptides may  
311 be well suited to the allosteric modulation of proteins and that C5 may be particularly  
312 susceptible to modulation by such approaches.

## Discussion

313 We present knob domain peptides as novel therapeutic molecules, which rely on the bovine  
314 immune system to achieve high affinity binding through optimisation of amino acid  
315 composition, 3-D structure and disulphide bond network. Knob domains have only been  
316 recently isolated as a practicable antibody fragment(Macpherson *et al.*, 2020) and therefore  
317 structural information will greatly aid their development as therapeutics.

318 Due to the apparent structural homology of knob domains with certain venomous peptides, of  
319 which conotoxins and spider venoms are examples; it has been proposed that the knob  
320 domains of ul-CDRH3 might be similarly predisposed to target the concave epitopes of ion  
321 channels. Likewise, structural homology with defensin peptides has garnered hypotheses

322 regarding an improved ability to bind viral capsid coats. Indeed, bovine antibodies with ul-  
323 CDRH3 have been raised against the viral capsid of HIV with exceptional efficiency, given  
324 the challenging nature of the antigen(Sok *et al.*, 2017; Stanfield *et al.*, 2020). However, the  
325 study presented here shows that, in the case of C5, concave epitopes are not the knob  
326 domain's sole preserve. Notably, the MG8 domain epitope of K8 offers a planar  
327 pharmacophore and, while the K92 epitope is more undulating, casual inspection of the C5  
328 structure reveals numerous deeper cavities available.

329 We note that the structural architecture of the knob domains varies for the epitope. Their  
330 immune derivation means that, unlike cysteine-rich peptides derived from other natural  
331 sources, such as venoms, the bovine immune system can be used to define specificity for any  
332 antigen. Comparative structural analysis suggests knob domain paratopes are differentiated  
333 from conventional antibodies, offering a different binding architecture to the ubiquitous VHH  
334 antibody fragment. While firm conclusions are hampered by limited examples, the number of  
335 interactions does not seem dissimilar from a mAb, which might be beneficial for tackling  
336 high affinity protein-protein interactions.

337 Knob domains offer hydrophobic paratopes, from which binding affinities broadly  
338 comparable to a conventional mAb can be obtained. The latent hydrophobicity is a likely  
339 consequence of germline priming for cysteine mutations which means the conserved IGDH8-  
340 2 D- gene segment, which encodes the knob domain and majority of the stalk, contains an  
341 astonishing 15 glycine and 17 tyrosine residues, each of which can be mutated to cysteine  
342 with a single base pair change. We propose that hydrophobicity may be a strategy to  
343 minimise desolvation entropy and thereby maximise the value of a H-bond network, enabling  
344 the most ligand-efficient, antibody-derived binding domain described to date.

345 Our structures demonstrate that the importance of the network of disulphide bonds goes  
346 beyond a stabilising role. An apparent paucity of secondary structure would suggest that  
347 stabilisation of the domain is indeed critical, but disulphide bonds are also a source of  
348 electron density for the paratope. We show that this electron density mediates sulphur- $\pi$   
349 interactions between the disulphide bond and nearby aromatic residues mediating intra- and  
350 inter-chain interactions. Finally, the disulphide bonds contribute even more hydrophobicity  
351 to the paratope which can improve the free enthalpy of local polar interactions. For example,  
352 the backbone amide and carbonyl of C23<sub>K92</sub> form interchain H-bonds with C5, capitalising on

353 the stability and proximal electron density of the disulphide bond to lower conformational  
354 and desolvation entropy.

355 Functional characterisation at the level of individual complement pathways identified K57 as  
356 a novel C5 inhibitor, which is a fully efficacious inhibitor of the terminal pathway in response  
357 to both CP and AP activation, and a potential therapeutic candidate for complement mediated  
358 disorders. Additionally, the discovery of K149 as a ‘silent binder’ of C5 may be of  
359 considerable value as a non-inhibitory reagent for the detection of native C5.

360 This study used X-ray crystallography in concert with solution biophysics methods to  
361 elaborate the mechanisms underpinning allosteric inhibition of proteins. With the caveat of  
362 small sample size, half of the knob domains exemplified in this study were allosteric. K92  
363 achieved selective inhibition of the alternative pathway through a non-competitive  
364 mechanism. To our knowledge, this is the first reported example of complement pathway  
365 specific inhibition through C5 and the first experimental evidence reported for mechanistic  
366 differences between the AP and CP C5 convertases. This suggests an expanded therapeutic  
367 scope for C5, whereby tuning of the conformational ensemble with allosteric compounds can  
368 bias activation to leave certain complement pathways intact. Complete inhibition of the  
369 terminal pathway has been shown to increase the susceptibility of eculizumab patients to  
370 *Neisseria meningitidis* infections (McNamara *et al.*, 2017). Selective inhibition of C5-  
371 cleavage by the AP C5-convertase, and not the CP C5-convertase, may partially preserve  
372 serum bactericidal activity thereby lowering the risk of meningococcal disease.

373 While we cannot definitively explain why K92 was selective for the AP, through HDX-MS,  
374 we detected changes in the distal CUB and C5d domains. As the mechanism of K92 is non-  
375 competitive which precludes a steric mechanism, efficacy might be achieved through  
376 modulation of the CUB and C5d domains, in a manner similar to the immune evasion  
377 molecule OmCI. SAXS analysis also suggests that K8, K57 and K92 increase the flexibility  
378 of C5 and effects on dynamics may be a contributing factor in realising efficacy. This was  
379 most pronounced for K8 which appears to substantially affect the conformational sampling of  
380 C345C.

381 We also saw an unexpected degree of negative cooperativity between the different knob  
382 domains, suggesting that all the functional knob domains perturb the conformational state of  
383 C5 such that changes are induced in different regions. K57, with an  $E_{max}$  of 100 % for both  
384 pathways, was not demonstrably allosteric but still showed cooperativity with other

385 functional knob domains, suggesting it stabilises a conformation of C5 that is less  
386 energetically favourable for binding of the other ligands. In HDX-MS experiments, K57  
387 induces changes which span the length of C5, in a similar manner to K92, but the nature of  
388 the changes, and route of travel, are distinct to each ligand.

389 Our observations with K92 suggest that further work may be required to elucidate the  
390 mechanism of action of another binder of the MG1 and MG5 domains, SSL7. Given that  
391 SSL7 can be a partial inhibitor(Laursen *et al.*, 2010), even with co-binding of IgA, this  
392 precludes a steric mechanism and invites biophysical studies in solution. Additionally,  
393 another tick-derived inhibitor, Cirp-T, was also recently reported as predominantly binding to  
394 the MG4 domain, with an orthosteric mechanism of action attributed. However, we note that  
395 published data only showed an  $E_{max}$  of < 90 % in AP driven assays(Reichhardt *et al.*, 2020),  
396 indicating it is an allosteric C5 inhibitor for the AP, and potentially also the CP, C5  
397 convertase, which may merit further investigation. This study highlights the importance of  
398 orthogonal biophysical techniques for the accurate interpretation of crystal structures. Taking  
399 a solely crystallographic approach, the constraints of the crystal lattice would have masked  
400 many of the distal effects that we observed.

401 This study is the first application of knob domain peptides and reveals an unexpectedly high  
402 incidence of allosteric modulators of complement C5. It is entirely possible that C5 could be  
403 particularly susceptible to allosteric modulation, or that by combining solution biophysics  
404 methods we may have observed effects that are typically missed. This study introduces knob  
405 domain peptides as a new peptide modality with unexplored therapeutic potential for the  
406 modulation of proteins and protein-protein interactions.

## 407 **Methods**

408 **Complement proteins.** Human C5 was affinity purified using an E141A, H164A OmCI  
409 column(Macpherson *et al.*, 2018). Briefly, human serum (TCS biosciences) was diluted 1:1  
410 (v/v) with PBS, 20 mM EDTA and applied to a 5 mL Hi-Trap NHS column (GE Healthcare),  
411 which contained 20 mg of E141A H164A OmCI protein, at a rate of 1 mL/minute. The  
412 column was washed with 5x column volumes (CV) of PBS, C5 was then eluted using 2 M  
413 MgCl<sub>2</sub> and immediately dialysed into PBS. C5b was prepared from human C5 by incubating  
414 C5 with C5b-3, factor B and factor D, at a 1:10 molar ratio, as previously described(Jore *et al.*,  
415 2016). C5a was removed using a spin column with 30 kDa cut-off (Thermo Fisher).



416 **Knob domain peptide production** Knob domain peptides were expressed fused to the  
417 CDRH3 of the PGT-121 Fab, as previously described (Macpherson *et al.*, 2020). Plasmid  
418 DNA for each construct was amplified using QIAGEN Plasmid Plus Giga Kits. Expi293F  
419 cultures were transfected with Expifectamine 293 Transfection kits (Invitrogen), as per the  
420 manufacturer's instructions. The cells were cultured for four days, and supernatants harvested  
421 by centrifuged at 4000 rpm for one hour. Harvested supernatants were applied to a Hi-Trap  
422 Nickel excel columns (GE Healthcare) using an Akta pure (GE Healthcare). Cell supernatants  
423 were loaded at 2.5 mL/minute, followed by a wash of 7x CV of PBS, 0.5 M NaCl. A second  
424 wash with 7x CV of Buffer A (0.5 M NaCl, 0.02 M Imidazole, PBS pH 7.3) was performed  
425 and samples were eluted by isocratic elution with 10x CV of Buffer B (0.5 M NaCl, 0.25 M  
426 Imidazole, PBS (pH 7.3). Post elution, the protein containing fractions were pooled and  
427 buffer exchanged into PBS, using dialysis cassettes (Thermo Fisher).

428 For isolation of the knob domain peptide, PGT-121 Fab-knob peptide fusion proteins were  
429 incubated with tobacco etch virus (TEV) protease, at a ratio of 100:1 (*w/w*), for a minimum of  
430 2 hours at room temperature. Peptides were purified using a Waters UV-directed  
431 FractionLynx system with a Waters XBridge Protein BEH C4 OBD Prep Column (300 Å, 5  
432 µm, 19 mm x 100 mm). An aqueous solvent of water, 0.1 % trifluoroacetic acid (TFA) and an  
433 organic solvent of 100 % MeCN was used. The column was run at 20 mL/min at 40 °C with a  
434 gradient of 5-50 % organic solvent, over 11 minutes. Fractions containing knob peptide were  
435 pooled and lyophilised using a Labconco Freezone freeze drier.

436 **Complement activation assays.** For the C3 and C9 ELISAs, microtiter plates (MaxiSorp;  
437 Nunc) were incubated overnight at 4°C with 50 µL of a solution of in 75 mM sodium  
438 carbonate (pH 9.6) containing either: 2.5 µg/ml aggregated human IgG (Sigma-Aldrich) for  
439 CP, or 20 µg/ml zymosan (Sigma-Aldrich) for AP. As a negative control, wells were coated  
440 with 1 % (*w/v*) BSA/PBS. Microtiter plates were washed four times with 250 µL of wash  
441 buffer (50 mM Tris-HCl, 150 mM NaCl and 0.1 % Tween 20 (pH 8) between each step of the  
442 procedure. Wells were blocked using 250 µL of 1 % (*w/v*) BSA/PBS for 2 hours at room  
443 temperature. Normal human serum was diluted in either gelatin veronal buffer with calcium  
444 and magnesium (GVB<sup>++</sup>: 0.1 % gelatin, 5 mM Veronal buffer, 145 mM NaCl, 0.025 % NaN<sub>3</sub>,  
445 0.15 mM calcium chloride, 1 mM magnesium chloride, pH 7.3; for CP) or Mg-EGTA (2.5  
446 mM veronal buffer [pH 7.3] containing 70 mM of NaCl, 140 mM of glucose, 0.1 % gelatin, 7  
447 mM of MgCl<sub>2</sub>, and 10 mM of EGTA; for AP). Serum was used at a concentration of 1 % in  
448 CP or 5 % in AP and was mixed with serially diluted concentrations of peptides (16 µM –

449 15.6 nM) in GVB<sup>++</sup> or Mg-EGTA buffer, and preincubated on ice for 30 minutes. Peptide-  
450 serum solutions were then incubated in the wells of microtiter plates for 35 minutes for CP  
451 assays (both C3b and C9 detection) or 35 min for AP (C3b) or 60 min for AP (C9), at 37 °C.  
452 Complement activation was assessed through detection of deposited complement activation  
453 factors using specific antibodies against C3b (rat anti-human C3d, Hycult; HM2198) and C9  
454 (goat anti-human C9, CompTech; A226), at a 1:1000 dilution. Bound primary antibodies  
455 were detected with HRP-conjugated goat anti-rat (Abcam; ab97057) or rabbit anti-goat  
456 (Dako; P0449) secondary antibodies, at a 1:1000 dilution. Bound HRP-conjugated antibodies  
457 were detected using TMB One solution (Eco-TEK) with absorbance measured at 450 nm.

458 For the C5b ELISA, assays were run using the CP and AP Complement functional ELISA  
459 kits (SVAR). For sample preparation: serum was diluted as per the respective protocol for the  
460 CP and AP assays. Serial dilutions of peptides were prepared and allowed to incubate with  
461 serum for 15 minutes at room temperature, prior to plating.

462 For the C5a ELISA, assays were run using the Complement C5a Human ELISA Kit  
463 (Invitrogen). For sample preparation: at the end of the 37 °C incubation of the serum/peptide  
464 samples on the C5b ELISA assay plate, 50 µL of the diluted, activated serum was transferred  
465 to a C5a ELISA assay plate containing 50 µL/well of Assay Buffer. All subsequent  
466 experimental steps were performed as described in the protocol.

467 **Haemolysis assays.** GVB<sup>++</sup> or Mg EGTA buffers, which had been supplemented with 2.5%  
468 glucose (*w/v*), were used for the CP and AP assays, respectively. For the AP, 150 µL of rabbit  
469 erythrocytes (TCS Biosciences) were washed twice, by addition of 1 mL of buffer and  
470 centrifugation at 800 xg for 1 minute, and finally resuspended in 500 µL of buffer. For the  
471 CP, 150 µL sheep erythrocytes (TCS Biosciences) were washed twice with 1 mL of buffer  
472 and sensitised with a 1/1000 dilution of rabbit anti- sheep red blood cell stroma antibody  
473 (Sigma; S1389). After a 30 °C / 30 minutes incubation, with shaking, the cells were re-  
474 washed and resuspended with 500 µL of buffer. Serial dilutions of peptide were prepared in  
475 the respective buffers and normal human serum was added at 1% for the CP and 4.5% for the  
476 AP (corresponding to CH50 of the serum). 90 µL of peptide-serum mixtures were plated into  
477 a V-bottom 96-well microtiter plate (Corning) and 10 µL of erythrocytes were added. Plates  
478 were incubated for 30 minutes at 37 °C, with shaking. Finally, 50 µL of buffer was added, the  
479 plates centrifuged at 800 xg, and 80 µL of supernatant was transferred to an ELISA plate  
480 (Nunc) and absorbance measured at 405 nm.

481 **Crystallography and structure determination.** 6.1 mg/ml C5 (20 mM Tris-HCl, 75 mM  
482 NaCl, pH 7.35) was mixed at a 1:1 molar ratio with either the K8 or K92 peptides.  
483 Crystallisation trials were initiated by the vapor-diffusion method at 18 °C with a 1:1 mixture  
484 of mother liquor (v/v). C5-K8 crystals were grown in a mother liquor of 0.1 M ADA, 14 %  
485 ethanol (v/v), pH 6.0. For C5-K92 crystals, the mother liquor was 0.1 M bicine/Trizma (pH  
486 8.5), 10 % (w/v) PEG 8000, 20 % (v/v) ethylene glycol, 30 mM sodium fluoride, 30 mM  
487 sodium bromide, 30 mM sodium iodide(Gorrec, 2009). Prior to flash freezing in liquid  
488 nitrogen, C5-K8 crystals were cryoprotected in mother liquor with 30 % MPD (v/v). C5-K92  
489 crystals were frozen without additional cryoprotection.

490 Data were collected at the Diamond Light Source (Harwell, UK), on beamline I03, at a  
491 wavelength of 0.9762 Å. The C5-K8 structure was solved using the automated molecular  
492 replacement pipeline Balbes(Long *et al.*, 2008) using the apo C5 structure (PDB accession  
493 code: 3CU7), minus the C345c domain. The C5-K8 complex crystallised in space group  
494 P2<sub>1</sub>2<sub>1</sub>2<sub>1</sub> with 1 molecule in the asymmetric unit. A backbone model of the K8 peptide was  
495 produced using ARP-wARP(Langer *et al.*, 2008) which informed manual model building in  
496 Coot(Emsley *et al.*, 2010), within the CCP4 suite(Winn *et al.*, 2011). The model was  
497 subjected to multiple rounds of refinement in Refmac(Murshudov, Vagin and Dodson, 1997)  
498 and Phenix(Adams *et al.*, 2010). The overall geometry in the final structure of the C5-K8  
499 complex is good, with 97.2 % of residues in favoured regions of the Ramachandran plot and  
500 no outliers.

501 The C5-K92 complex crystallised in space group C2 with 1 molecule in the asymmetric unit.  
502 C5 was solved by molecular replacement with Phaser(McCoy *et al.*, 2007) using the C5-  
503 OmCI-RaCI structure (PDB accession code: 5HCC), with OmCI and RaCI removed. Manual  
504 building of the K92 peptide in Coot was greatly informed by mass spectroscopy disulphide  
505 mapping experiments. The model was subjected to multiple rounds of manual rebuilding in  
506 Coot and refinement in Phenix(Adams *et al.*, 2010). The overall geometry in the final  
507 structure of the C5-K92 complex is good, with 95.2 % of residues in favoured regions of the  
508 Ramachandran plot and no outliers. Structure factors and coordinates have been deposited in  
509 the PDB (PDB accession codes 7AD6 and 7AD7). Crystal trials were also performed with the  
510 C5-K57 and C5-K149 complexes, but the resulting crystals diffracted poorly.

511 **Disulphide mapping of K92 peptide.** 250 µL K92 peptide at 1 mg/mL was reduced with 6  
512 µL of 0.5 M Dithiothreitol (Thermo Fisher) for 40 minutes at 37 °C and alkylated with

513 addition of 18  $\mu\text{L}$  of 2-Iodoacetamide (Thermo Fisher), at room temperature for 30 minutes.  
514 Overnight dialysis into assay buffer (7.5mM Tris-HCl, 1.5mM  $\text{CaCl}_2$ , pH 7.9) was performed  
515 using 2 kDa slide-a-lyzer cassettes (Thermo Fisher). Chymotrypsin (sequencing grade, Roche  
516 Applied Sciences) was reconstituted to 1  $\mu\text{g}/\mu\text{L}$  in assay buffer and 5  $\mu\text{L}$  of reconstituted  
517 enzyme was added to 80  $\mu\text{L}$  of sample. Once mixed, the sample was incubated at 37  $^\circ\text{C}$  for  
518 1.5 hours before being quenched with 5  $\mu\text{L}$  of 1 % TFA. Samples were diluted 1 in 10 and 5  
519  $\mu\text{L}$  was loaded onto the analytical column.

520 Liquid Chromatography electrospray ionisation mass spectrometry was acquired using an  
521 Ultimate 3000 UHPLC system (Thermo Fisher Scientific, San Jose, CA) coupled with a Q-  
522 Exactive Plus Orbitrap (Thermo Fisher Scientific). Separations were performed using  
523 gradient elution (A: 0.1 % Formic acid, B: 0.1 % Formic acid in acetonitrile) on an Acquity  
524 UPLC BEH C18 Column (130  $\text{\AA}$ , 1.7  $\mu\text{m}$ , 2.1 mm X 150 mm; Waters Corp., Milford, MA,  
525 USA) with the column temperature maintained at 40  $^\circ\text{C}$ .

526 The following analytical gradient at 0.2 mL/min was used: 1 % B was held for 2 minutes, 1-  
527 36 % B over 28 minutes, 36-50 % over 5 minutes, 50-99 % B over 0.5 minutes. There were  
528 sequential wash steps with changes in gradient of 99 %-1 % B over 0.5 minutes (at a higher  
529 flow rate of 0.5 mL/min) before equilibration at 1 % B for 6.5 minutes (at the original 0.2  
530 mL/min).

531 A Full MS / dd-MS2 (Top 5) scan was run in positive mode. Full MS: scan range was 200 to  
532 2000 m/z with 70,000 resolution (at 200 m/z) and a  $3 \times 10^6$  AGC target, 100 ms maximum  
533 Injection time. The dd-MS2: 2.0 m/z isolation window, CID fragmentation (NCE 28) with  
534 fixed first mass of 140.0 m/z, with a 17,500 resolution (at 200 m/z),  $1 \times 10^5$  AGC target, 200  
535 ms maximum injection time. The source conditions of the MS were capillary voltage; 3 kV,  
536 S-lens RF level; 50, Sheath gas flow rate; 25, Auxiliary gas flow rate; 10, Auxiliary gas  
537 heater temp; 150  $^\circ\text{C}$  and the MS inlet capillary was maintained at 320  $^\circ\text{C}$ .

538 Data were acquired using Xcalibur<sup>TM</sup> 4.0 software (Thermo Fisher Scientific), and raw files  
539 were analysed by peptide mapping analysis using Biopharma Finder 2.0 software (Thermo  
540 Fisher Scientific) by performing a disulphide bond search with a chymotrypsin (medium  
541 specificity) digest against the K92 peptide sequence. Assignments and integrations from  
542 Biopharma Finder were filtered to include only peptides identified as containing a single  
543 disulphide bond and with an experimental mass within |5| ppm of the theoretical mass.

544 Intensities for all peptides containing the same cysteines pairing were summed and  
545 percentages were obtained from the summed against total intensities.

546 **Binding pose metadynamics.** Simulation structures were prepared using Schrodinger's  
547 Maestro Protein preparation wizard. The molecular dynamics runs were performed using the  
548 Schrodinger's default implementation of the binding pose metadynamics with the peptide  
549 chain considered in place of a ligand. Additional RMSD calculations for the peptide internal  
550 structure assessment in the last 20% of the dynamics were performed relative to the starting  
551 structures.

552 **Small angle X-ray scattering (SAXS)** Data was collected at the EMBL P12 beam line  
553 (PETRA III, DESY Hamburg, Germany(Blanchet *et al.*, 2015)). Data was collected with  
554 inline size exclusion chromatography (SEC) mode, using the Agilent 1260 Infinity II Bio-  
555 inert LC. 50  $\mu$ L of complement component C5 at 31.6  $\mu$ M (5.96 mg/ml) was injected onto a  
556 Superdex 200 Increase 5/150 column (GE Healthcare) at a flow rate of 0.35 ml/min. The  
557 mobile phase was comprised of 20mM Tris pH 7.35, 75mM NaCl, and 3% glycerol. The  
558 column elute was directly streamed to the SAXS capillary cell, and throughout the 15-  
559 minute-run 900 frames of 1 sec exposure were collected. After data reduction and radial  
560 averaging the program CHROMIXS(Panjekovich and Svergun, 2018) was employed. Around  
561 100 statistically similar buffer frames were selected and used for background subtraction of  
562 the sample frames from the chromatographic peak. This results in the final  $I(s)$  vs  $s$  scattering  
563 profiles, where  $s = 4\pi\sin\theta/\lambda$ ,  $2\theta$  is the scattering angle and  $\lambda = 1.24 \text{ \AA}$ . The scattering data in  
564 the momentum transfer range  $0.05 < s < 0.32 \text{ nm}^{-1}$  were collected with a PILATUS 6M pixel  
565 detector at a distance of 3.1 m from the sample.

566 ATSAS 2.8(Franke *et al.*, 2017) was employed for further data analysis and modelling. The  
567 program PRIMUS(Konarev *et al.*, 2003) was used to perform Guinier analysis ( $\ln I(s)$  versus  
568  $s^2$ ) from which the radius of gyration,  $R_G$ , was determined. Distance probability functions,  
569  $p(r)$ , were calculated using the inverse Fourier transformation method implemented in  
570 GNOM(Svergun, 1992) that provided the maximum particle dimension,  $D_{\max}$ . The  
571 concentration-independent molecular weight estimate,  $MW_{vc}$ , is based on the volume of  
572 correlation(Rambo and Tainer, 2013). The values are reported in Supplementary 3.1.

573 Theoretical scattering profiles were computed from X-ray coordinates using Crysol(Svergun,  
574 Barberato and Koch, 1995) and SREFLEX(Panjekovich and Svergun, 2016) was used to refine  
575 the models. For this, the program partitions the structure into pseudo-domains and



576 hierarchically employs NMA to find the domain rearrangements minimizing the discrepancy  
577  $\chi^2$  between the SAXS curve computed from the refined model and the experimental data.

578 On the same day, multi-angle laser light scattering (MALLS) data were collected with a  
579 separate SEC run under the same experimental conditions (set-up, buffer, run parameters  
580 etc.). For this, a Wyatt Technologies miniDAWN TREOS multiangle laser light scattering  
581 detector coupled to an OptiLab T-Rex differential refractometer for protein concentration  
582 determination ( $dn/dc$  was taken as 0.185) was used. The MALLS system was calibrated  
583 relative to the scattering from toluene. The MWMALLS distribution of species eluting from  
584 the SEC column were determined with the Wyatt ASTRA7 software package.

585 The experimental SAXS data and the models derived from them were deposited to the Small  
586 Angle Scattering Biological Data Bank (accession number: SASDJA6).

587 **Hydrogen/deuterium mass spectrometry** 6  $\mu\text{M}$  of C5 was incubated with 10  $\mu\text{M}$  of peptide  
588 (K8, K92 or K57) to achieve complex during deuterium exchange conditions. 4  $\mu\text{L}$  of C5 or  
589 the C5-peptide complex were diluted into 57  $\mu\text{L}$  of 10 mM phosphate in  $\text{H}_2\text{O}$  (pH 7.0), or  
590 into 10 mM phosphate in  $\text{D}_2\text{O}$  (pD 7.0) at 25 °C. The deuterated samples were then incubated  
591 for 0.5, 2, 15 and 60 minutes at 25 °C. After the reaction, all samples were quenched by  
592 mixing at 1:1 ( $v/v$ ) with a quench buffer (4 M Guanadine Hydrochloride, 250 mM Tris (2-  
593 carboxyethyl) phosphine hydrochloride (TCEP), 100 mM phosphate) at 1 °C. The final  
594 mixed solution was pH 2.5. The mixture was the immediately injected into the nanoAcquity  
595 HDX module (Waters Corp.) for peptic digest, using an enzymatic online digestion column  
596 (Waters Corp.) in 0.2 % formic acid in water at 20 °C and with a flow rate of 100  $\mu\text{L}/\text{min}$ . All  
597 deuterated time points and un-deuterated controls were carried out in triplicate with blanks  
598 run between each data-point.

599 Peptide fragments were then trapped using an Acquity BEH C18 1.7  $\mu\text{M}$  VANGUARD  
600 chilled pre-column for 3 min. Peptides were eluted into a chilled Acquity UPLC BEH C18  
601 1.7  $\mu\text{m}$  1.0  $\times$  100 using the following gradient: 0 minute, 5 % B; 6 minutes, 35% B; 7  
602 minutes, 40 % B; 8 minutes, 95 % B, 11 minutes, 5 % B; 12 minutes, 95 % B; 13 minutes, 5  
603 % B; 14 minutes, 9 5% B; 15 minutes, 5 % B (A: 0.2 %  $\text{HCOOH}$  in  $\text{H}_2\text{O}$ , B: 0.2 %  $\text{HCOOH}$   
604 in acetonitrile. The trap and UPLC columns were both maintained at 0°C. Peptide fragments  
605 were ionized by positive electrospray into a Synapt G2-Si mass spectrometer (Waters). Data  
606 acquisition was run in ToF-only mode over an  $m/z$  range of 50-2000 Th, using an MSE  
607 method (low collision energy, 4V; high collision energy: ramp from 18V to 40V). Glu-1-



608 Fibrinopeptide B peptide was used for internal lock mass correction. To avoid significant  
609 peptide carry-over between runs, the on-line Enzymate pepsin column (Waters) was washed  
610 three times with pepsin wash (0.8 % formic acid, 1.5 M Gu-HCl, 4 % MeOH) and a blank run  
611 was performed between each sample run.

612 MSE data from undeuterated samples of C5 were used for sequence identification using the  
613 Waters Protein Lynx Global Server 2.5.1 (PLGS). Ion accounting files for the 3 control  
614 samples were combined into a peptide list imported into Dynamx v3.0 software (Waters).  
615 The output peptides were subjected to further filtering in DynamX. Filtering parameters used  
616 were: minimum and maximum peptide sequence length of 4 and 25, respectively, minimum  
617 intensity of 1000, minimum MS/MS products of 2, minimum products per amino acid of 0.2,  
618 and a maximum MH + error threshold of 10 ppm. DynamX was used to quantify the isotopic  
619 envelopes resulting from deuterium uptake for each peptide at each time-point. Furthermore,  
620 all the spectra were examined and checked visually to ensure correct assignment of m/z peaks  
621 and only peptides with a high signal to noise ratios were used for HDX-MS analysis.

622 Following manual filtration in Dynamx, confidence intervals for differential HDX-MS  
623 ( $\Delta$ HDX) measurements of individual time point were calculated using Deuterios(Lau *et al.*,  
624 2019) software. Only peptides which satisfied a  $\Delta$ HDX confidence interval of 98 % were  
625 considered significant. The  $\Delta$ HDX was then plotted onto the C5 structure in Pymol.

626 **Surface plasmon resonance, single cycle kinetics.** On a Biacore 8K (GE Healthcare),  
627 human C5b was immobilised on a CM5 chip (GE Healthcare). Flow cells were activated  
628 using a standard immobilisation protocol: EDC/NHS was mixed at 1:1 ratio (flow rate, 10  
629  $\mu$ L/min; contact time, 30 seconds). C5b, at 1  $\mu$ g/mL in pH 4.5 sodium-acetate buffer, was  
630 immobilized on flow cell two only (flow rate, 10  $\mu$ L/min; contact time, 420 seconds). Finally,  
631 ethanolamine was applied to both flow cells (flow rate, 10  $\mu$ L/min; contact time, 420  
632 seconds). A final immobilization level of 500-700 response units was obtained.

633 Single-cycle kinetics were measured using a 7-point, 3-fold serial dilution (spanning a range  
634 of 1  $\mu$ M to 1.4 nM) in HBS-EP buffer (GE healthcare). A high flow rate of 40  $\mu$ L/min was  
635 used, with a contact time of 300 seconds and a dissociation time of 2700 seconds. Binding to  
636 the reference surface was subtracted, and the data were fitted to a single-site binding model  
637 using Biacore evaluation software. All sensorgrams were inspected for evidence of mass  
638 transport limitation using the flow rate-independent component of the mass transfer constant  
639 (tc).

640 **Surface plasmon resonance, cross-blocking.** On a Biacore 8K (GE Healthcare), human C5,  
641 was amine coupled to a CM5 chip, using the same protocol as for C5b. A final  
642 immobilization level of approximately 1000-2000 response units was obtained. For cross  
643 blocking, the surface was saturated with two sequential injections of a 20  $\mu$ M knob domain  
644 solution in HBS-EP buffer (GE healthcare), using a flow rate of 30  $\mu$ L/min and contact time  
645 of 300 seconds. This was immediately followed with an injection of a second knob domain  
646 peptide, again at 20  $\mu$ M in HBS-EP, with a flow rate of 30  $\mu$ L/min and a contact time of 270  
647 seconds, the dissociation phase was measured for 600 seconds. Binding to the reference  
648 surface was subtracted, and sensorgrams were plotted in Graphpad Prism software.

#### 649 **Competing Interests**

650 This work was performed by A.M. as partial fulfilment of the requirements for a PhD from  
651 the University of Bath and was funded by UCB. A.M., S.S., V.O., J.S., B.H., V.E., Z.A. and  
652 A.D.G.L are present or past employees of UCB and may hold shares and/or stock options.  
653 T.E.M is a Board member of Ra Pharmaceuticals, Inc. All other authors declare no competing  
654 interests.

#### 655 **Acknowledgements**

656 We would like to thank John Cashman for his help during crystallography screening.

#### 657 **Author Contribution**

658 A.M., A.D.G.L. and J.v.d.E. designed the study. The manuscript was written by A.M.,  
659 A.D.G.L. and J.v.d.E., with input from all authors. A.M expressed and purified peptides.  
660 P.H.N. and T.E.M. purified complement proteins. In vitro assays were performed by A.M and  
661 M.L. Crystallography was performed by A.M with assistance from J.R.B, S.S, S.C and  
662 J.v.d.E. Disulphide mapping was performed by B.H. Comparative antibody analysis was  
663 performed by S.R., J.S. and C.M.D. Binding pose metadynamics was by V.O. SAXS  
664 experiments were performed by M.G. and D.S. and HDX-MS by Z.A. and V.E. SPR was  
665 performed by A.M. Supervision was by A.D.G.L and J.v.d.E.

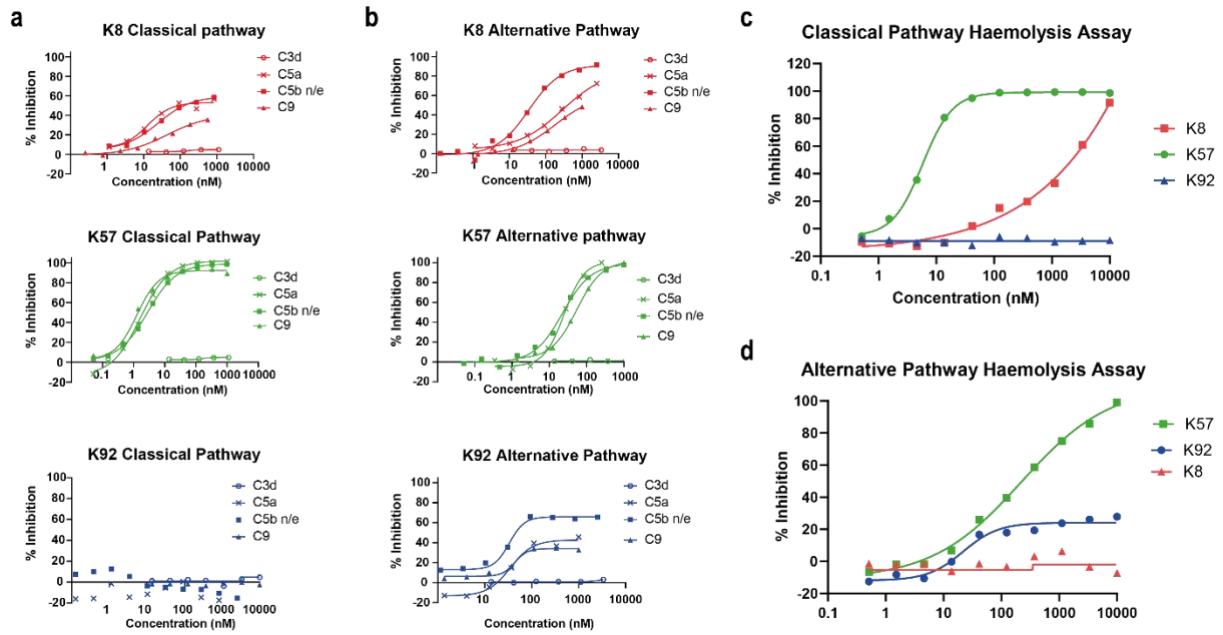

**Figure 1. Functional modulation of C5 via knob domain peptides.** Classical pathway (CP) driven ELISA assays (a) and alternative pathway (AP) driven ELISA assays (b) are shown. For both pathways, the inhibition of 3d deposition, C5b neo-epitope formation, C5a release and C9 deposition were tracked. Haemolysis assays with sheep erythrocytes, for the CP (c), and rabbit erythrocytes, for the AP (d), show that K57 is a potent and efficacious inhibitor of both pathways. K92 is selective, partial antagonist of the AP, while K8 is a weak antagonist of the CP but did not show efficacy in the AP haemolysis assay, below 10  $\mu$ M.

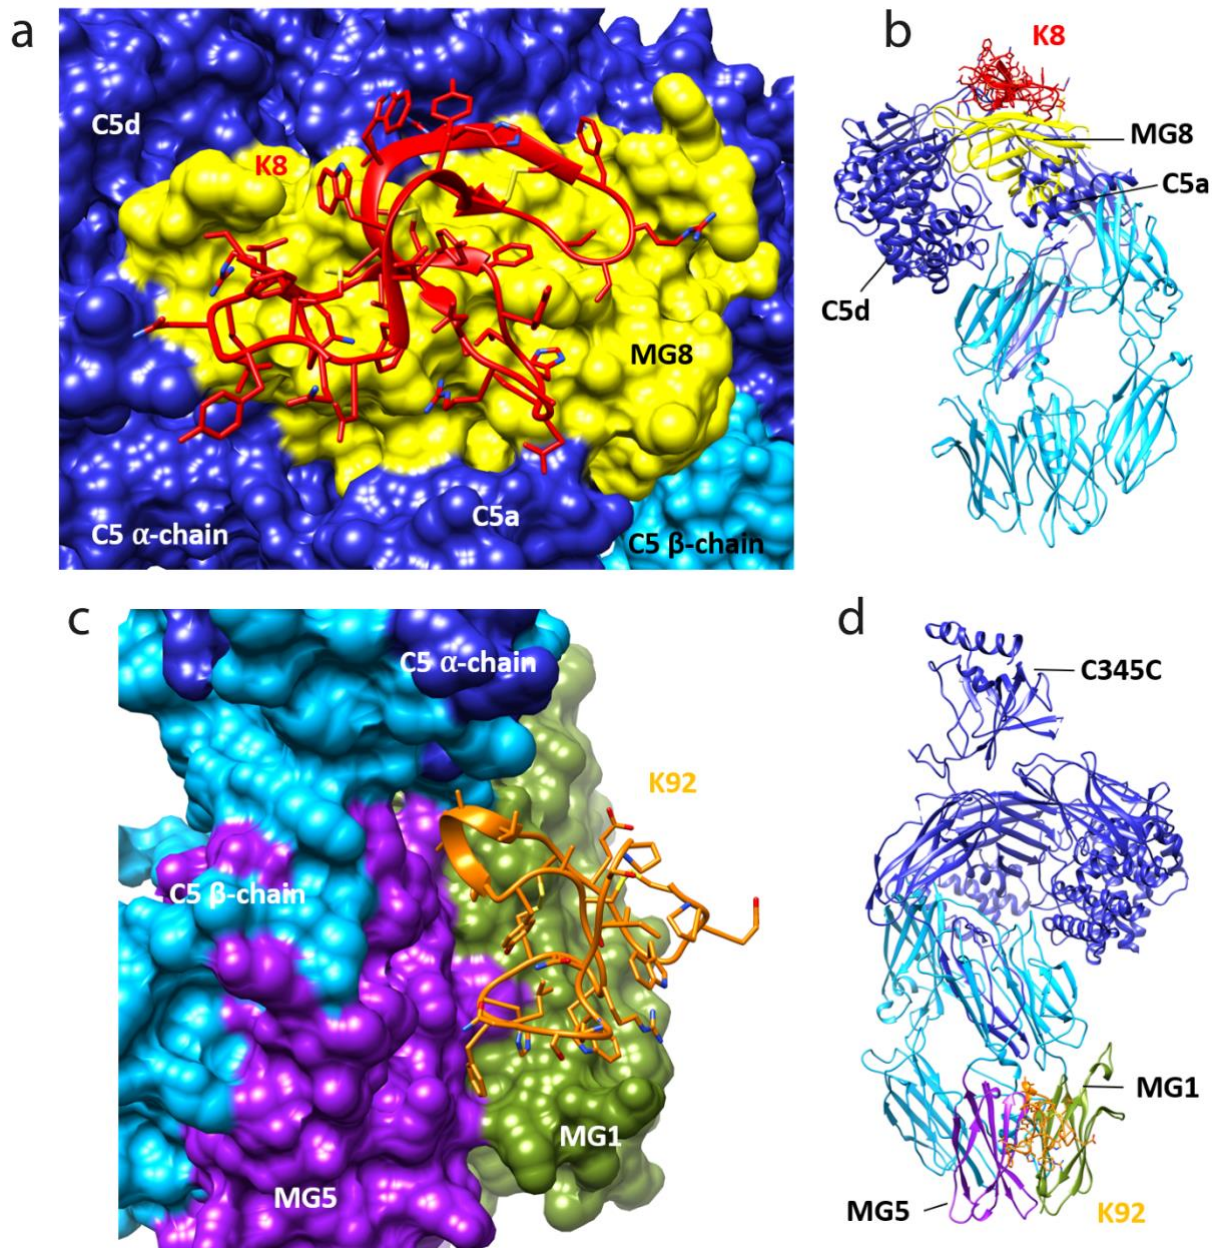

**Figure 2. Knob domain crystal structures.** Panels a and b show the crystal structure of C5 in complex with the K8 knob domain peptide. The K8 epitope is located on a previously unreported ligand binding site on the MG8 domain of C5 (a). The entire structure is shown (b), notably, electron density for the flexible C345C domain of C5 was absent, preventing building of this domain in the structure. The crystal structure of C5 in complex with the K92 knob domain peptide is shown (panels c and d). The K92 epitope is located between the MG1 and MG5 domains.



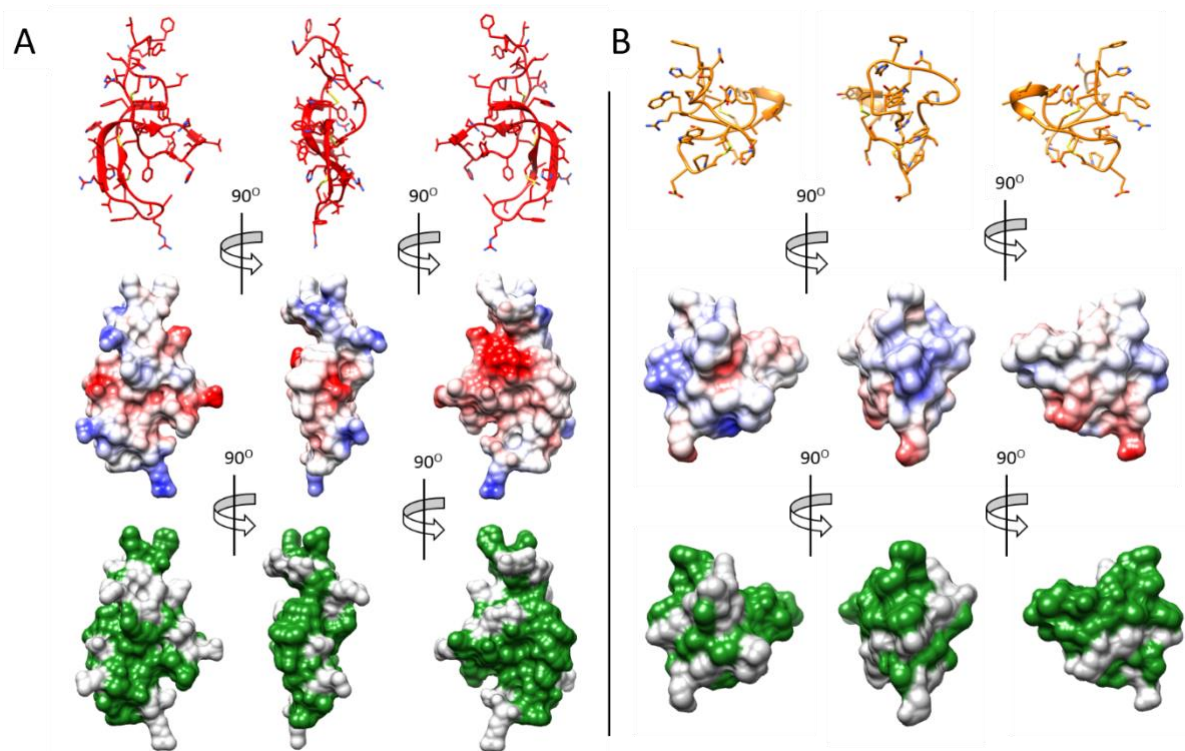

**Figure 3. The hydrophobic paratopes of knob domains.** The K8 and K92 knob domain peptides are shown in panels a and b, respectively. For each, the binding face is shown in the first column, with a 90° rotation shown in the second column and a further 90° rotation in the third columns shows the opposing, non-binding face of each domain. In the top row the amino acid side chains and disulphide bonds are shown in addition to the secondary structure. Using UCSF Chimera(Pettersen *et al.*, 2004), surface visualisation and coulombic colouring has been applied to denote charge in the middle row, with blue denoting positively charged residues and red negatively charged. The bottom row shows colouring of the non-polar residues, highlighting the hydrophobic nature of the knob domain paratopes.

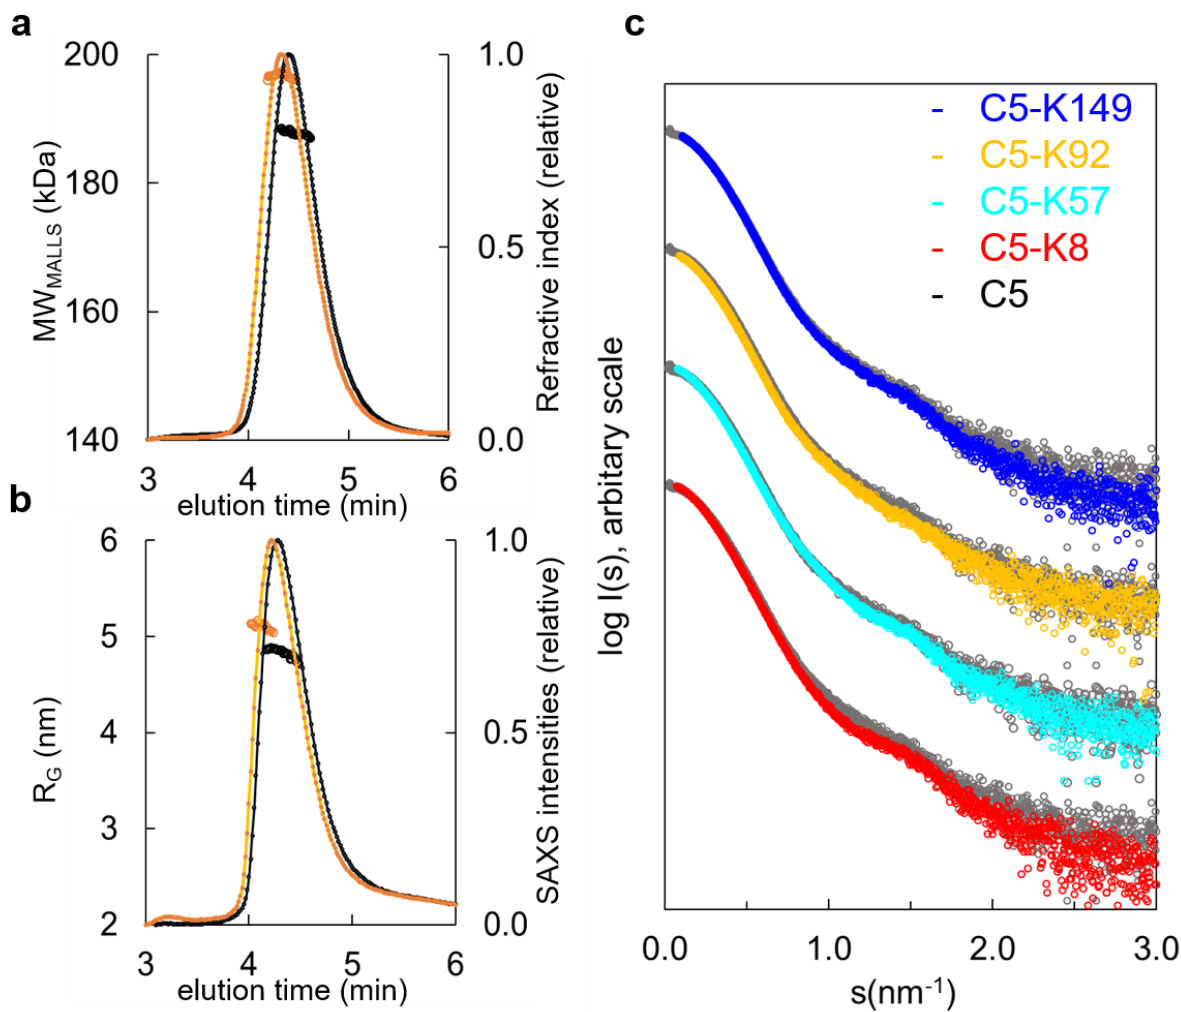

**Figure 4. Hydrodynamic properties and solution conformation of C5 and C5-knob domain complexes by SAXS.**

SEC-MALLS chromatograms (a) for apo C5 (black) and C5-K92 (orange), show a homogenous molecular weight increase across the C5-K92 elution peak. The SEC-SAXS elution profile collected under identical experimental conditions (b) shows an increase in radius of gyration ( $R_G$ ) for the C5-K92 complex. Scattering curves of all C5-knob domains are shown (c), the C5-knob domain complexes are shown against apo C5 (in grey), for ease of viewing the curves are arbitrarily shifted in the Y axis.



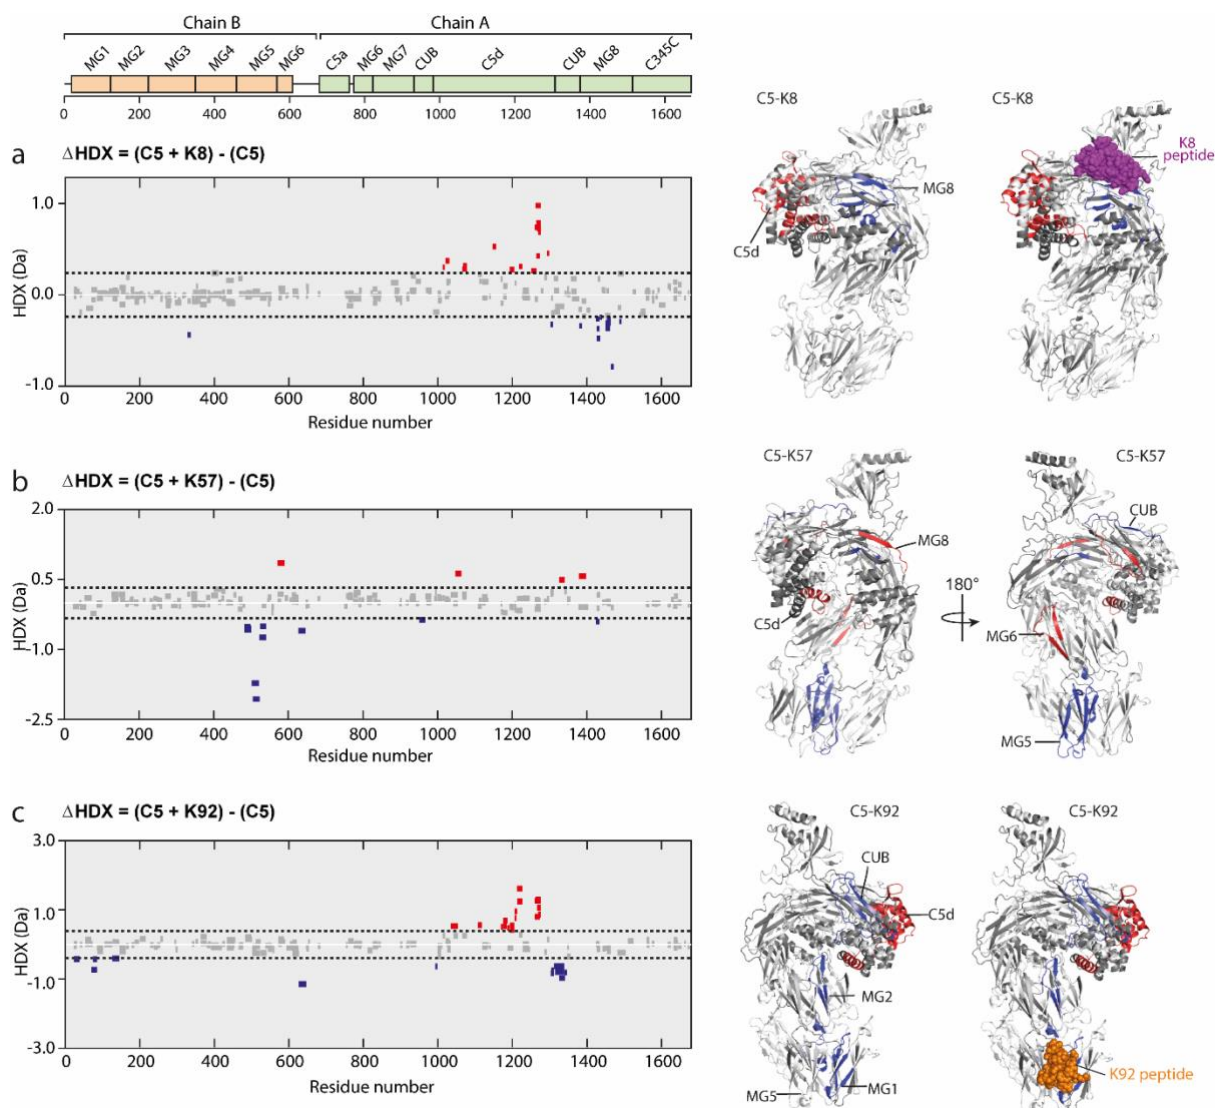

**Figure 5. Impact of knob domain binding on the structural dynamics and conformation of C5.** Differential HDX ( $\Delta\text{HDX}$ ) plots for C5 in complex with knob domains (a) K8, (b) K57 and (c) K92 at 1 hour of deuterium exposure. Blue denotes peptides with decreased HDX (backbone H-bond stabilisation) and red denotes peptides with increased HDX (backbone H-bond destabilisation). 98% confidence intervals are shown as dotted lines. Peptides in grey have insignificant  $\Delta\text{HDX}$ . Measurements were performed at in triplicate and all HDX-MS peptide data is detailed in Supporting Table XX.  $\Delta\text{HDX}$  for C5 + K8, C5 + K57 and C5 + K92 are coloured onto C5 (PDB accession: 5HCC, minus OmCI and RaCI).

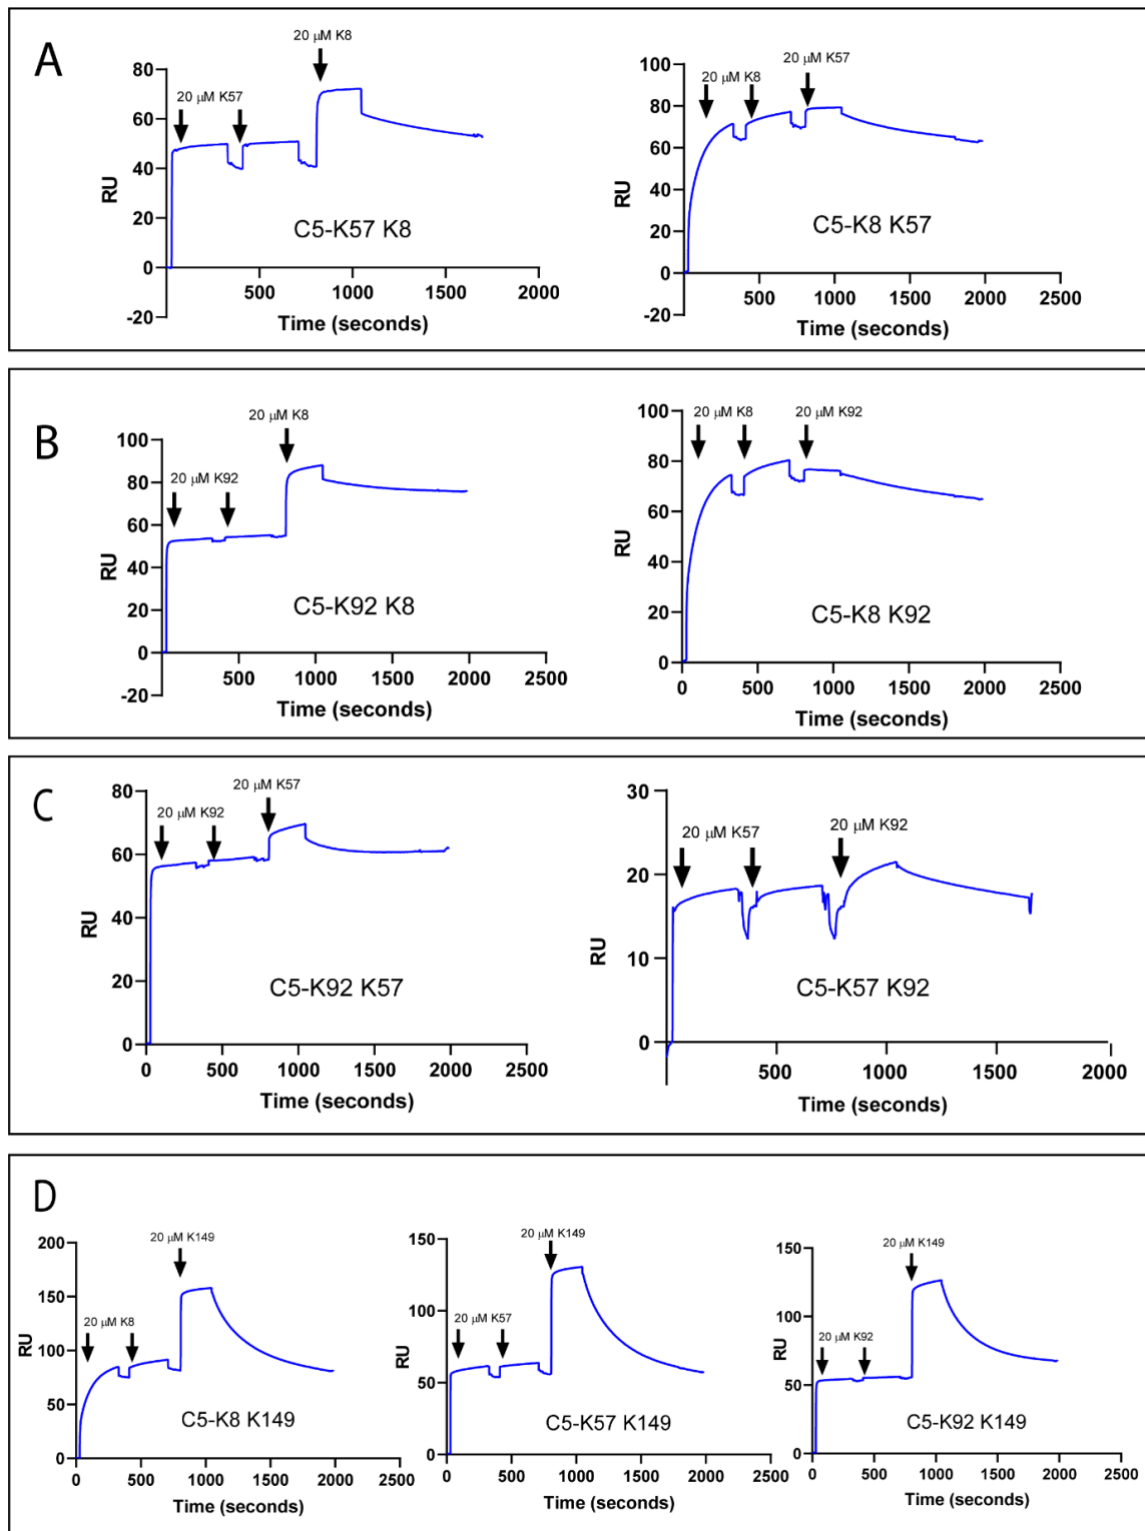

**Figure 6. Surface plasmon resonance: cross blocking.** Panels A, B and C highlight negative cooperativity between the K8, K92 and K57 peptides. Neither K57 or K92 can bind to the C5-K8 complex but K8 can bind, albeit at a lower level to, C5-K57 and C5-K92. We could not detect any negative cooperativity between K8, K57 or K92 with the silent binder K149, shown in panel D.

## References

- Adams, P. D., Afonine, P. V., Bunkoczi, G., Chen, V. B., Davis, I. W., Echols, N., Headd, J. J., Hung, L. W., Kapral, G. J., Grosse-Kunstleve, R. W., McCoy, A. J., Moriarty, N. W., Oeffner, R., Read, R. J., Richardson, D. C., Richardson, J. S., Terwilliger, T. C. and Zwart, P. H. (2010) 'PHENIX: a comprehensive Python-based system for macromolecular structure solution', *Acta Crystallogr D Biol Crystallogr*, 66(Pt 2), pp. 213-21.
- Aleshin, A. E., DiScipio, R. G., Stec, B. and Liddington, R. C. (2012) 'Crystal structure of C5b-6 suggests structural basis for priming assembly of the membrane attack complex', *J Biol Chem*, 287(23), pp. 19642-52.
- Bestebroer, J., Aerts, P. C., Rooijackers, S. H., Pandey, M. K., Kohl, J., van Strijp, J. A. and de Haas, C. J. (2010) 'Functional basis for complement evasion by staphylococcal superantigen-like 7', *Cell Microbiol*, 12(10), pp. 1506-16.
- Biesecker, G., Dihel, L., Enney, K. and Bendele, R. A. (1999) 'Derivation of RNA aptamer inhibitors of human complement C5', *Immunopharmacology*, 42(1-3), pp. 219-30.
- Blanchet, C. E., Spilotros, A., Schwemmer, F., Graewert, M. A., Kikhney, A., Jeffries, C. M., Franke, D., Mark, D., Zengerle, R., Cipriani, F., Fiedler, S., Roessle, M. and Svergun, D. I. (2015) 'Versatile sample environments and automation for biological solution X-ray scattering experiments at the P12 beamline (PETRA III, DESY)', *J Appl Crystallogr*, 48(Pt 2), pp. 431-443.
- Borodovsky, A., Yucius, K., Sprague, A., Banda, N. K., Holers, V. M., Vaishnav, A., Maier, M., Kallanthottathil, R., Charisse, K., Kuchimanchi, S., Manoharan, M., Salant, D. J., Fitzgerald, K., Meyers, R. and Sorensen, B. (2014) 'Aln-CC5, an Investigational RNAi Therapeutic Targeting C5 for Complement Inhibition', *Blood*, 124(21), pp. 1606-1606.
- Clark, A. J., Tiwary, P., Borrelli, K., Feng, S., Miller, E. B., Abel, R., Friesner, R. A. and Berne, B. J. (2016) 'Prediction of Protein-Ligand Binding Poses via a Combination of Induced Fit Docking and Metadynamics Simulations', *J Chem Theory Comput*, 12(6), pp. 2990-8.
- DiScipio, R. G. (1992) 'Formation and structure of the C5b-7 complex of the lytic pathway of complement', *J Biol Chem*, 267(24), pp. 17087-94.
- Dunbar, J., Krawczyk, K., Leem, J., Baker, T., Fuchs, A., Georges, G., Shi, J. and Deane, C. M. (2014) 'SAbDab: the structural antibody database', *Nucleic Acids Res*, 42(Database issue), pp. D1140-6.
- Emsley, P., Lohkamp, B., Scott, W. G. and Cowtan, K. (2010) 'Features and development of Coot', *Acta Crystallogr D Biol Crystallogr*, 66(Pt 4), pp. 486-501.
- Franke, D., Petoukhov, M. V., Konarev, P. V., Panjkovich, A., Tuukkanen, A., Mertens, H. D. T., Kikhney, A. G., Hajizadeh, N. R., Franklin, J. M., Jeffries, C. M. and Svergun, D. I. (2017) 'ATSAS 2.8: a comprehensive data analysis suite for small-angle scattering from macromolecular solutions', *J Appl Crystallogr*, 50(Pt 4), pp. 1212-1225.
- Fredslund, F., Laursen, N. S., Roversi, P., Jenner, L., Oliveira, C. L., Pedersen, J. S., Nunn, M. A., Lea, S. M., DiScipio, R., Sottrup-Jensen, L. and Andersen, G. R. (2008) 'Structure of and influence of a tick complement inhibitor on human complement component 5', *Nat Immunol*, 9(7), pp. 753-60.
- Fusani, L., Palmer, D. S., Somers, D. O. and Wall, I. D. (2020) 'Exploring Ligand Stability in Protein Crystal Structures Using Binding Pose Metadynamics', *J Chem Inf Model*, 60(3), pp. 1528-1539.
- Gorrec, F. (2009) 'The MORPHEUS protein crystallization screen', *J Appl Crystallogr*, 42(Pt 6), pp. 1035-1042.
- Hadders, M. A., Bubeck, D., Roversi, P., Hakobyan, S., Forneris, F., Morgan, B. P., Pangburn, M. K., Llorca, O., Lea, S. M. and Gros, P. (2012) 'Assembly and regulation of the membrane attack complex based on structures of C5b6 and sC5b9', *Cell Rep*, 1(3), pp. 200-7.
- Haselbach, D., Schrader, J., Lambrecht, F., Henneberg, F., Chari, A. and Stark, H. (2017) 'Long-range allosteric regulation of the human 26S proteasome by 20S proteasome-targeting cancer drugs', *Nat Commun*, 8, pp. 15578.
- Holm, L. (2020) 'DALI and the persistence of protein shape', *Protein Sci*, 29(1), pp. 128-140.

- Hutchinson, J. M., Mesa, K. A., Alexander, D. L., Yu, B., O'Rourke, S. M., Limoli, K. L., Wrin, T., Deeks, S. G. and Berman, P. W. (2019) 'Unusual Cysteine Content in V1 Region of gp120 From an Elite Suppressor That Produces Broadly Neutralizing Antibodies', *Front Immunol*, 10, pp. 1021.
- Jendza, K., Kato, M., Salcius, M., Srinivas, H., De Erkenez, A., Nguyen, A., McLaughlin, D., Be, C., Wiesmann, C., Murphy, J., Bolduc, P., Mogi, M., Duca, J., Namil, A., Capparelli, M., Darsigny, V., Meredith, E., Tichkule, R., Ferrara, L., Heyder, J., Liu, F., Horton, P. A., Romanowski, M. J., Schirle, M., Mainolfi, N., Anderson, K. and Michaud, G. A. (2019) 'A small-molecule inhibitor of C5 complement protein', *Nature Chemical Biology*, 15(7), pp. 666-668.
- Jore, M. M., Johnson, S., Sheppard, D., Barber, N. M., Li, Y. I., Nunn, M. A., Elmlund, H. and Lea, S. M. (2016) 'Structural basis for therapeutic inhibition of complement C5', *Nat Struct Mol Biol*, 23(5), pp. 378-86.
- Jubb, H. (2015) 'Arpeggio: An interatomic interaction calculation web server available at <http://structure.bioc.cam.ac.uk/arpeggio>.'
- Klein, M. T., Vinson, P. N. and Niswender, C. M. (2013) 'Approaches for probing allosteric interactions at 7 transmembrane spanning receptors', *Prog Mol Biol Transl Sci*, 115, pp. 1-59.
- Konarev, P. V., Volkov, V. V., Sokolova, A. V., Koch, M. H. J. and Svergun, D. I. (2003) 'PRIMUS: a Windows PC-based system for small-angle scattering data analysis', *Journal of Applied Crystallography*, 36(5), pp. 1277-1282.
- Krissinel, E. and Henrick, K. (2007) 'Inference of macromolecular assemblies from crystalline state', *J Mol Biol*, 372(3), pp. 774-97.
- Langer, G., Cohen, S. X., Lamzin, V. S. and Perrakis, A. (2008) 'Automated macromolecular model building for X-ray crystallography using ARP/wARP version 7', *Nat Protoc*, 3(7), pp. 1171-9.
- Lau, A. M. C., Ahdash, Z., Martens, C. and Politis, A. (2019) 'Deuterios: software for rapid analysis and visualization of data from differential hydrogen deuterium exchange-mass spectrometry', *Bioinformatics*, 35(17), pp. 3171-3173.
- Lau, J. L. and Dunn, M. K. (2018) 'Therapeutic peptides: Historical perspectives, current development trends, and future directions', *Bioorg Med Chem*, 26(10), pp. 2700-2707.
- Laursen, N. S., Andersen, K. R., Braren, I., Spillner, E., Sottrup-Jensen, L. and Andersen, G. R. (2011) 'Substrate recognition by complement convertases revealed in the C5-cobra venom factor complex', *EMBO J*, 30(3), pp. 606-16.
- Laursen, N. S., Gordon, N., Hermans, S., Lorenz, N., Jackson, N., Wines, B., Spillner, E., Christensen, J. B., Jensen, M., Fredslund, F., Bjerre, M., Sottrup-Jensen, L., Fraser, J. D. and Andersen, G. R. (2010) 'Structural basis for inhibition of complement C5 by the SSL7 protein from *Staphylococcus aureus*', *Proc Natl Acad Sci U S A*, 107(8), pp. 3681-6.
- Lee, A. C., Harris, J. L., Khanna, K. K. and Hong, J. H. (2019) 'A Comprehensive Review on Current Advances in Peptide Drug Development and Design', *Int J Mol Sci*, 20(10).
- Long, F., Vagin, A. A., Young, P. and Murshudov, G. N. (2008) 'BALBES: a molecular-replacement pipeline', *Acta Crystallogr D Biol Crystallogr*, 64(Pt 1), pp. 125-32.
- Macpherson, A., Liu, X., Dedi, N., Kennedy, J., Carrington, B., Durrant, O., Heywood, S., van den Elsen, J. and Lawson, A. D. G. (2018) 'The rational design of affinity-attenuated OmCI for the purification of complement C5', *J Biol Chem*, 293(36), pp. 14112-14121.
- Macpherson, A., Scott-Tucker, A., Spiliotopoulos, A., Simpson, C., Staniforth, J., Hold, A., Snowden, J., Manning, L., van den Elsen, J. and Lawson, A. D. G. (2020) 'Isolation of antigen-specific, disulphide-rich knob domain peptides from bovine antibodies', *PLoS Biol*, 18(9), pp. e3000821.
- McCoy, A. J., Grosse-Kunstleve, R. W., Adams, P. D., Winn, M. D., Storoni, L. C. and Read, R. J. (2007) 'Phaser crystallographic software', *J Appl Crystallogr*, 40(Pt 4), pp. 658-674.
- McNamara, L. A., Topaz, N., Wang, X., Hariri, S., Fox, L. and MacNeil, J. R. (2017) 'High Risk for Invasive Meningococcal Disease Among Patients Receiving Eculizumab (Soliris) Despite Receipt of Meningococcal Vaccine', *MMWR Morb Mortal Wkly Rep*, 66(27), pp. 734-737.
- Murshudov, G. N., Vagin, A. A. and Dodson, E. J. (1997) 'Refinement of macromolecular structures by the maximum-likelihood method', *Acta Crystallogr D Biol Crystallogr*, 53(Pt 3), pp. 240-55.

- Nurnberger, J., Philipp, T., Witzke, O., Opazo Saez, A., Vester, U., Baba, H. A., Kribben, A., Zimmerhackl, L. B., Janecke, A. R., Nagel, M. and Kirschfink, M. (2009) 'Eculizumab for atypical hemolytic-uremic syndrome', *N Engl J Med*, 360(5), pp. 542-4.
- Panjikovich, A. and Svergun, D. I. (2016) 'Deciphering conformational transitions of proteins by small angle X-ray scattering and normal mode analysis', *Phys Chem Chem Phys*, 18(8), pp. 5707-19.
- Panjikovich, A. and Svergun, D. I. (2018) 'CHROMIXS: automatic and interactive analysis of chromatography-coupled small-angle X-ray scattering data', *Bioinformatics*, 34(11), pp. 1944-1946.
- Pettersen, E. F., Goddard, T. D., Huang, C. C., Couch, G. S., Greenblatt, D. M., Meng, E. C. and Ferrin, T. E. (2004) 'UCSF Chimera--a visualization system for exploratory research and analysis', *J Comput Chem*, 25(13), pp. 1605-12.
- Rambo, R. P. and Tainer, J. A. (2013) 'Accurate assessment of mass, models and resolution by small-angle scattering', *Nature*, 496(7446), pp. 477-81.
- Reichhardt, M. P., Johnson, S., Tang, T., Morgan, T., Tebeka, N., Popitsch, N., Deme, J. C., Jore, M. M. and Lea, S. M. (2020) 'An inhibitor of complement C5 provides structural insights into activation', *Proc Natl Acad Sci U S A*, 117(1), pp. 362-370.
- Ricardo, A., Arata, M., DeMarco, S. J., Dhamnaskar, K., Hammer, R., Josephson, K., Seyb, K., Tobe, S., Wang, Z., Zheng, H. and Treco, D. (2014) 'Development of RA101348, a Potent Cyclic Peptide Inhibitor of C5 for Complement-Mediated Diseases', *Blood*, 124(21), pp. 2936-2936.
- Romay-Penabad, Z., Carrera Marin, A. L., Willis, R., Weston-Davies, W., Machin, S., Cohen, H., Brasier, A. and Gonzalez, E. B. (2014) 'Complement C5-inhibitor rEV576 (coversin) ameliorates in-vivo effects of antiphospholipid antibodies', *Lupus*, 23(12), pp. 1324-6.
- Rother, R. P., Rollins, S. A., Mojcik, C. F., Brodsky, R. A. and Bell, L. (2007) 'Discovery and development of the complement inhibitor eculizumab for the treatment of paroxysmal nocturnal hemoglobinuria', *Nat Biotechnol*, 25(11), pp. 1256-64.
- Schatz-Jakobsen, J. A., Zhang, Y., Johnson, K., Neill, A., Sheridan, D. and Andersen, G. R. (2016) 'Structural Basis for Eculizumab-Mediated Inhibition of the Complement Terminal Pathway', *J Immunol*, 197(1), pp. 337-44.
- Smith, K., Pace, A., Ortiz, S., Kazani, S. and Rottinghaus, S. (2020) 'A Phase 3 Open-label, Randomized, Controlled Study to Evaluate the Efficacy and Safety of Intravenously Administered Ravulizumab Compared with Best Supportive Care in Patients with COVID-19 Severe Pneumonia, Acute Lung Injury, or Acute Respiratory Distress Syndrome: A structured summary of a study protocol for a randomised controlled trial', *Trials*, 21(1), pp. 639.
- Sok, D., Le, K. M., Vadnais, M., Saye-Francisco, K. L., Jardine, J. G., Torres, J. L., Berndsen, Z. T., Kong, L., Stanfield, R., Ruiz, J., Ramos, A., Liang, C. H., Chen, P. L., Criscitiello, M. F., Mwangi, W., Wilson, I. A., Ward, A. B., Smider, V. V. and Burton, D. R. (2017) 'Rapid elicitation of broadly neutralizing antibodies to HIV by immunization in cows', *Nature*, 548(7665), pp. 108-111.
- Stanfield, R. L., Berndsen, Z. T., Huang, R., Sok, D., Warner, G., Torres, J. L., Burton, D. R., Ward, A. B., Wilson, I. A. and Smider, V. V. (2020) 'Structural basis of broad HIV neutralization by a vaccine-induced cow antibody', *Sci Adv*, 6(22), pp. eaba0468.
- Svergun, D. (1992) 'Determination of the regularization parameter in indirect-transform methods using perceptual criteria', *Journal of Applied Crystallography*, 25(4), pp. 495-503.
- Svergun, D., Barberato, C. and Koch, M. H. J. (1995) 'CRY SOL - a Program to Evaluate X-ray Solution Scattering of Biological Macromolecules from Atomic Coordinates', *Journal of Applied Crystallography*, 28(6), pp. 768-773.
- Wilkinson, T., Dixon, R., Page, C., Carroll, M., Griffiths, G., Ho, L. P., De Soyza, A., Felton, T., Lewis, K. E., Phekoo, K., Chalmers, J. D., Gordon, A., McGarvey, L., Doherty, J., Read, R. C., Shankar-Hari, M., Martinez-Alier, N., O'Kelly, M., Duncan, G., Wallis, R., Sykes, J., Summers, C., Singh, D. and Collaborators, A. (2020) 'ACCORD: A Multicentre, Seamless, Phase 2 Adaptive Randomisation Platform Study to Assess the Efficacy and Safety of Multiple Candidate Agents for the Treatment of COVID-19 in Hospitalised Patients: A structured summary of a study protocol for a randomised controlled trial', *Trials*, 21(1), pp. 691.



Winn, M. D., Ballard, C. C., Cowtan, K. D., Dodson, E. J., Emsley, P., Evans, P. R., Keegan, R. M., Krissinel, E. B., Leslie, A. G., McCoy, A., McNicholas, S. J., Murshudov, G. N., Pannu, N. S., Potterton, E. A., Powell, H. R., Read, R. J., Vagin, A. and Wilson, K. S. (2011) 'Overview of the CCP4 suite and current developments', *Acta Crystallogr D Biol Crystallogr*, 67(Pt 4), pp. 235-42.

Wong, W. K., Robinson, S. A., Bujotzek, A., Georges, G., Lewis, A. P., Shi, J., Snowden, J., Taddese, B. and Deane, C. M. (2020) 'Ab-Ligity: Identifying sequence-dissimilar antibodies that bind to the same epitope', *bioRxiv*, pp. 2020.03.24.004051.

Zelek, W. M., Cole, J., Ponsford, M. J., Harrison, R. A., Schroeder, B. E., Webb, N., Jolles, S., Fegan, C., Morgan, M., Wise, M. P. and Morgan, B. P. (2020) 'Complement Inhibition with the C5 Blocker LFG316 in Severe COVID-19', *Am J Respir Crit Care Med*.



## Supplementary Material

### The allosteric modulation of Complement C5 by knob domain peptides

Alex Macpherson<sup>1,2\*</sup>, Maisem Laabei<sup>2</sup>, Zainab Ahdash<sup>1</sup>, Melissa Graewert<sup>3,4</sup>, James R. Birtley<sup>1</sup>, Sarah Schulze<sup>1</sup>, Susan Crennell<sup>2</sup>, Sarah A. Robinson<sup>4</sup>, Ben Holmes<sup>1</sup>, Vladas Oleinikovas<sup>1</sup>, Per H. Nilsson<sup>5,6</sup>, James Snowden<sup>1</sup>, Victoria Ellis<sup>1</sup>, Tom Eirik Mollnes<sup>6,7,8</sup>, Charlotte M. Deane<sup>4</sup>, Dmitri Svergun<sup>3,4</sup>, Alastair D.G. Lawson<sup>1</sup> and Jean van den Elsen<sup>2,9\*</sup>

<sup>1</sup> UCB, Slough, UK. SL1 3WE;

<sup>2</sup> Department of Biology and Biochemistry, University of Bath, Bath, UK. BA2 7AX;

<sup>3</sup> European Molecular Biology Laboratory, Hamburg Unit, 22607 Hamburg, Germany;

<sup>4</sup> Department of Statistics, University of Oxford, Oxford, UK;

<sup>5</sup> Department of Chemistry and Biomedicine, Linnaeus University, 391 82 Kalmar, Sweden;

<sup>6</sup> Department of Immunology, Oslo University Hospital, University of Oslo, Oslo, Norway;

<sup>7</sup> Research Laboratory, Bodø Hospital, K.G. Jebsen TREC, University of Tromsø, Tromsø, Norway;

<sup>8</sup> Centre of Molecular Inflammation Research, Norwegian University of Science and Technology, Trondheim, Norway;

<sup>9</sup> Centre for Therapeutic Innovation, University of Bath, Bath, UK. BA2 7AX

\*email [alex.macpherson@ucb.com](mailto:alex.macpherson@ucb.com) and [bssjmhve@bath.ac.uk](mailto:bssjmhve@bath.ac.uk)

## Supplementary Section 1. Functional assays

### Classical pathway C5b deposition ELISA.

Data from  $n=3$ , unless specified.

| Construct             | Geomean IC50 (nM) | Range (nM) | Average Emax (%) | Range (%)    |
|-----------------------|-------------------|------------|------------------|--------------|
| <b>K8<sup>a</sup></b> | 9.3               | 3.0-24.5   | 68.2             | 59.5 – 79.56 |
| <b>K57</b>            | 3.6               | 2.4 – 7.3  | 100.6            | 99.1 – 101.7 |
| <b>K92</b>            | ND*               | ND*        | ND*              | ND*          |
| <b>K149</b>           | ND*               | ND*        | ND*              | ND*          |

\*ND = Not detected.

<sup>a</sup> Data are an average from  $n=6$

### Alternative pathway C5b deposition ELISA.

Data from  $n=3$ , unless specified.

| Construct              | Geomean IC50 (nM) | Range (nM)  | Average Emax (%) | Range (%)    |
|------------------------|-------------------|-------------|------------------|--------------|
| <b>K8<sup>a</sup></b>  | 29.2              | 25.4 – 34.2 | 91.8             | 91.4 – 92.3  |
| <b>K57</b>             | 30.4              | 22.7 – 52.1 | 110.3            | 97.9 – 134.0 |
| <b>K92<sup>b</sup></b> | 32.4              | 31.5 - 33.1 | 62.14            | 58.0 - 67.7  |
| <b>K149</b>            | ND*               | ND*         | ND*              | ND*          |

\*ND = Not detected.

<sup>a</sup> Data are an average from  $n=5$

<sup>b</sup> Data are an average from  $n=4$

### Inhibition of classical pathway mediated C5a release.

Data from  $n=3$  independent titrations, unless otherwise stated

| Construct             | Geomean IC50 (nM) | Range (nM) | Average Emax (%) | Range (%)    |
|-----------------------|-------------------|------------|------------------|--------------|
| <b>K8<sup>a</sup></b> | 9.9               | 3.9 – 18.7 | 57.7             | 51.5 – 73.2  |
| <b>K57</b>            | 4.0               | 2.8 - 5.6  | 98.7             | 95.9 - 100.6 |
| <b>K92</b>            | ND*               | ND*        | ND*              | ND*          |
| <b>K149</b>           | ND*               | ND*        | ND*              | ND*          |

\*ND = Not detected.

<sup>a</sup> Data are an average from  $n=5$

### Inhibition of alternative pathway mediated C5a release.

Data from  $n=3$ , unless otherwise stated

| Construct             | Geomean IC50 (nM) | Range (nM)   | Average Emax (%) | Range (%)    |
|-----------------------|-------------------|--------------|------------------|--------------|
| <b>K8<sup>a</sup></b> | 150.2             | 49.3 – 85.86 | 71.8             | 49.3 – 85.9  |
| <b>K57</b>            | 26.6              | 25.0-27.7    | 97.8             | 95.1 - 101.3 |
| <b>K92</b>            | 43.3              | 39.9 – 45.3  | 43.3             | 39.9 – 45.2  |
| <b>K149</b>           | ND*               | ND*          | ND*              | ND*          |

\*ND = Not detected.

<sup>a</sup> Data are an average from  $n=4$

### Inhibition of classical pathway mediated C9 deposition.

Data from  $n=3$

| Construct             | Geomean IC <sub>50</sub> (nM) | Range (nM) | Average Emax (%) | Range (%)   |
|-----------------------|-------------------------------|------------|------------------|-------------|
| <b>K8<sup>#</sup></b> | -                             | -          | 63.4             | -           |
| <b>K57</b>            | 1.9                           | 1.3-2.5    | 97.9             | 92.4 - 97.9 |
| <b>K92</b>            | ND*                           | ND*        | ND*              | ND*         |
| <b>K149</b>           | ND*                           | ND*        | ND*              | ND*         |

\*ND = Not detected.

# Hill slopes < 0.5 IC<sub>50</sub> values not reported.

### Inhibition of alternative pathway mediated C9 deposition.

Data from  $n=3$ , unless otherwise stated.

| Construct   | Geomean IC <sub>50</sub> (nM) | Range (nM)    | Average Emax (%) | Range (%)     |
|-------------|-------------------------------|---------------|------------------|---------------|
| <b>K8</b>   | 232.4                         | 131.3 – 521.5 | 73.3             | 61.2 – 90.74  |
| <b>K57</b>  | 24.5                          | 20.6 - 27.6   | 100.7            | 100.1 - 100.9 |
| <b>K92</b>  | 791.9                         | 759.8 - 846.7 | 44.2             | 40.9 – 45.9   |
| <b>K149</b> | ND*                           | ND*           | ND*              | ND*           |

\*ND = Not detected.

### Inhibition of classical pathway haemolysis.

Data from  $n=3$

| Construct             | Geomean IC <sub>50</sub> (nM) | Range (nM) | Average Emax (%) | Range (%)    |
|-----------------------|-------------------------------|------------|------------------|--------------|
| <b>K8<sup>#</sup></b> | -                             | -          | 95.6             | 91.7 – 99.7  |
| <b>K57</b>            | 5.3                           | 4.9 – 5.7  | 99.7             | 99.2 – 100.1 |
| <b>K92</b>            | ND*                           | ND*        | ND*              | ND*          |

\*ND = Not detected.

# curves not well described by a 4-PL fit, IC<sub>50</sub> values not reported.

### Inhibition of alternative pathway haemolysis.

Data from  $n=3$

| Construct  | Geomean IC <sub>50</sub> (nM) | Range (nM)   | Average Emax (%) | Range (%)    |
|------------|-------------------------------|--------------|------------------|--------------|
| <b>K8</b>  | ND*                           | ND*          | ND*              | ND*          |
| <b>K57</b> | 402.7                         | 218 – 660    | 102.2            | 90.9 – 109.6 |
| <b>K92</b> | 16.9                          | 11.41 – 21.8 | 31.4             | 24.1 – 45.3  |

\*ND = Not detected.

## Supplementary Section 2. X-ray Crystallography

### Supplementary 2.1 Table of data collection and structure refinement statistics

|                                                     | C5-K8                              | C5-K92                  |
|-----------------------------------------------------|------------------------------------|-------------------------|
| <b>Data collection</b>                              |                                    |                         |
| Space group                                         | P 21 21 21                         | C 1 2 1                 |
| Cell dimensions                                     |                                    |                         |
| <i>a</i> , <i>b</i> , <i>c</i> (Å)                  | 81.56, 161.69, 187.38              | 204.27, 104.29, 154.88  |
| $\alpha$ , $\beta$ , $\gamma$ (°)                   | 90, 90, 90                         | 90, 124.89, 90          |
| Resolution (Å)                                      | 81.07-2.3 (2.382-2.3) <sup>a</sup> | 83.77-2.75 (2.848-2.75) |
| <i>R</i> <sub>merge</sub>                           | 0.043 (0.361)                      | 0.018 (0.204)           |
| <i>I</i> / $\sigma$ <i>I</i>                        | 13.17 (2.07)                       | 28.79 (4.38)            |
| CC <sub>1/2</sub>                                   | 0.99 (0.67)                        | 0.99 (0.92)             |
| Completeness (%)                                    | 0.99 (0.99)                        | 0.99 (0.99)             |
| Redundancy                                          | 13.5 (13.0)                        | 13.9 (14.0)             |
| <b>Refinement</b>                                   |                                    |                         |
| Resolution (Å)                                      | 81.56-2.3                          | 83.77-2.75              |
| No. reflections                                     | 110479 (10914)                     | 69381 (6877)            |
| <i>R</i> <sub>work</sub> / <i>R</i> <sub>free</sub> | 0.202/0.234                        | 0.219/0.253             |
| No. atoms (non-H)                                   |                                    |                         |
| Protein                                             | 11618                              | 13024                   |
| Ligand/ion                                          | 80                                 | 59                      |
| Water                                               | 402                                | 12                      |
| <i>B</i> factors                                    |                                    |                         |
| Protein                                             | 65.4                               | 100.5                   |
| Ligand/ion                                          | 87.9                               | 122.7                   |
| Water                                               | 51.9                               | 65.3                    |
| r.m.s. deviations                                   |                                    |                         |
| Bond lengths (Å)                                    | 0.003                              | 0.002                   |
| Bond angles (°)                                     | 0.62                               | 0.58                    |

<sup>a</sup>Values in parentheses are for highest-resolution shell.

**Supplementary 2.2. C5-K8 unit cell and crystal packing.** A unit cell with a single molecule of the C5-K8 complex is shown followed by orthogonal views showing packing interactions as seen in the crystal lattice. C5-K8 is shown in cartoon representation with C5 coloured blue and K8 in orange. Symmetry-related molecules of C5 are coloured magenta with K8 in orange.

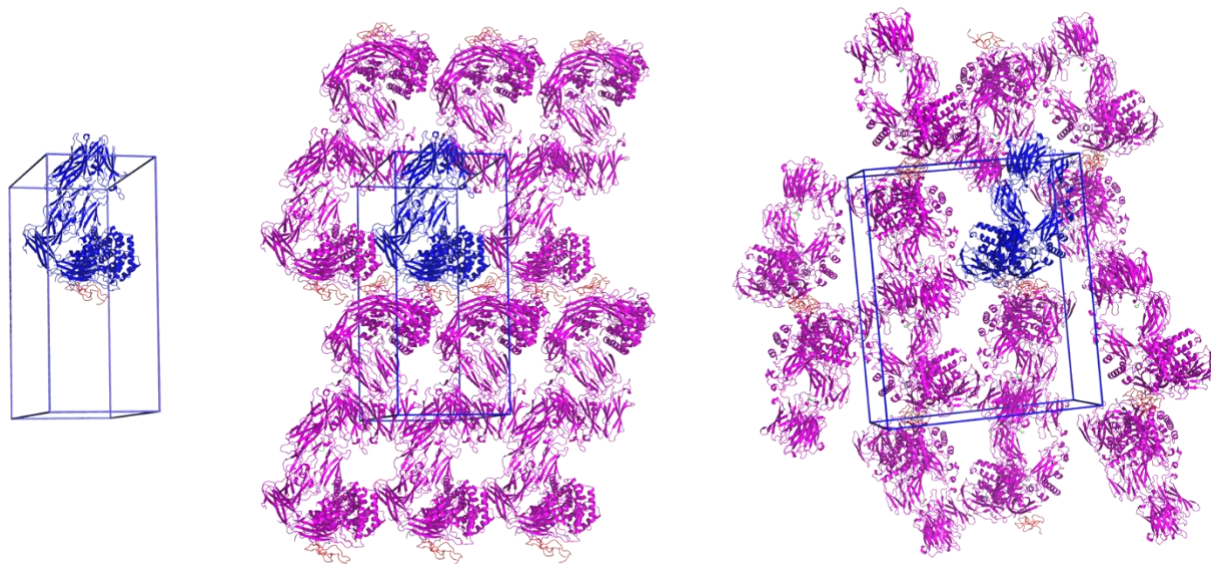

**Supplementary 2.3. C5-K92 unit cell and crystal packing.** A unit cell with a single molecule of the C5-K92 complex is shown followed by orthogonal views showing packing interactions as seen in the crystal lattice. C5-K92 is shown in cartoon representation with C5 coloured blue and K92 in orange. Symmetry-related molecules of C5 are coloured magenta with K92 in orange.

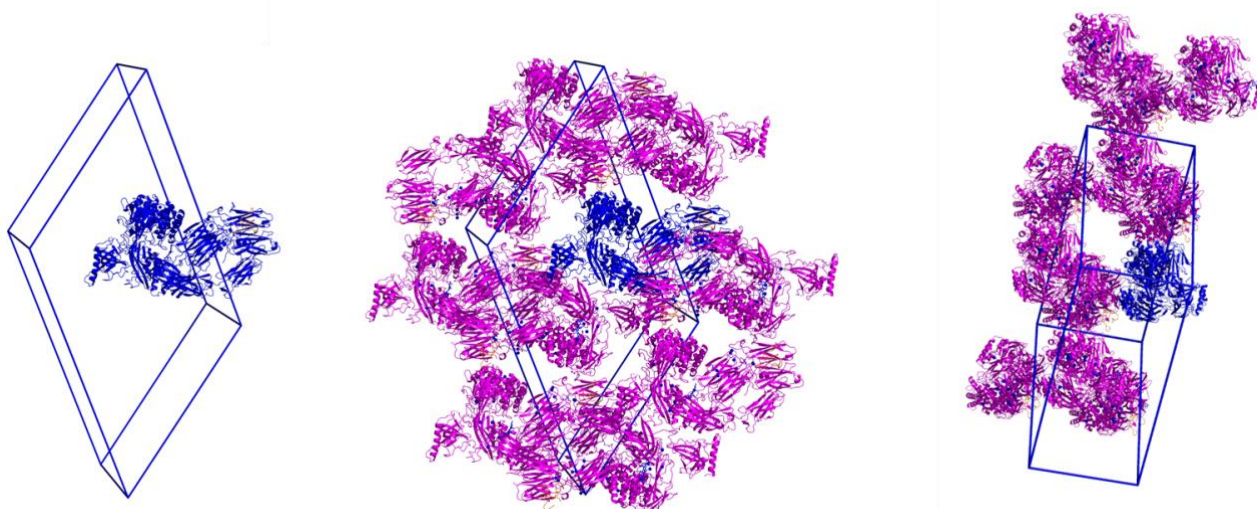



### Supplementary figure 2.4. Simulated annealing omit maps of the C5-peptide complexes.

The grey mesh shows mFo-DFc simulated annealing omit maps calculated in PHENIX and contoured at a) 3.0 sigma around the K8 peptide and b) at 1.0 sigma around the K92 peptide. In the omit calculation the peptides were deleted from the model. The peptides are displayed in green in cartoon representations with side chains shown as sticks and coloured according to the atom type (nitrogen in blue, oxygen in red, carbon in green and sulphur in yellow). Selected side chains are highlighted.

a)

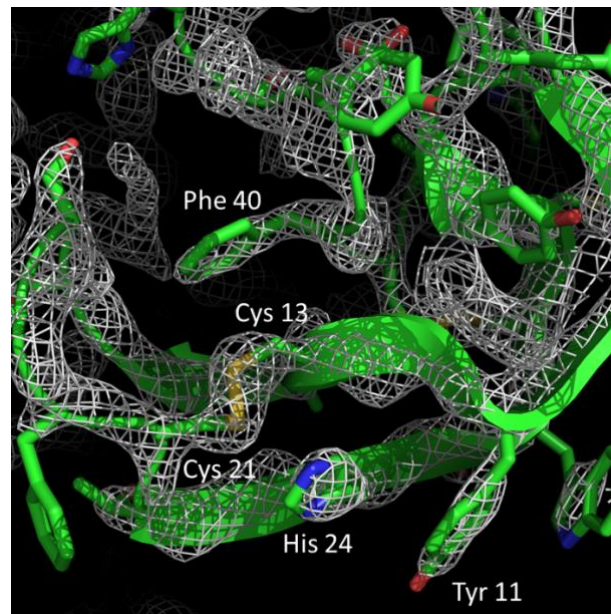

b)

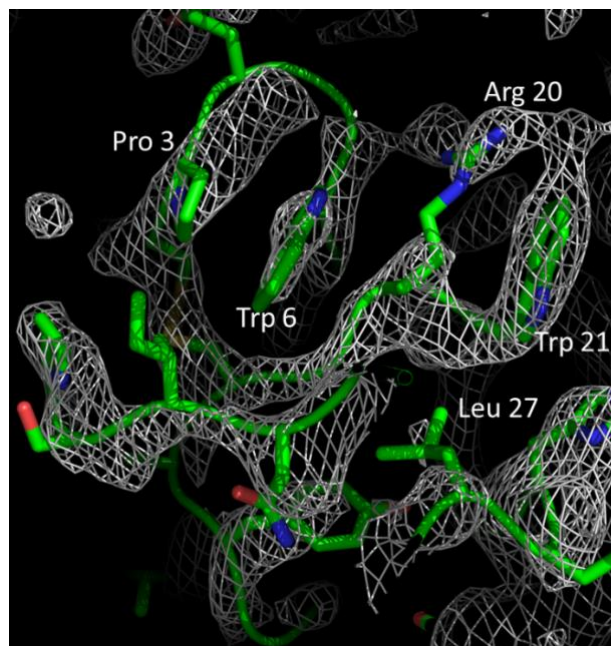



### Supplementary 2.5. Structural topology of the K8 peptide.

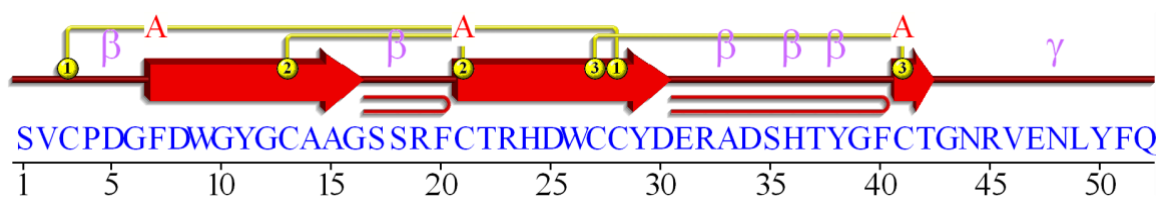

### Supplementary 2.6. Table of ionic interactions between K8 and C5. Ionic interactions as defined by the PDBePiSA macromolecular interfaces tool.

| K8                            |     | C5      |       |
|-------------------------------|-----|---------|-------|
| <i>Ionic interactions (5)</i> |     |         |       |
| D25                           | OD2 | NZ      | K1409 |
| R32                           | NH1 | OD2     | D1471 |
|                               | NH2 | OD1/OD2 |       |
| H36                           | NE2 | OD1     | D1382 |

### Supplementary 2.7 Table of hydrogen bonds between K8 and C5. Hydrogen bonding interactions as defined by the PDBePiSA macromolecular interfaces tool.

| K8                         |     | C5  |       |
|----------------------------|-----|-----|-------|
| <i>Hydrogen bonds (18)</i> |     |     |       |
| A14                        | O   | N   | L1379 |
| G16                        | N   | O   | L1379 |
|                            | O   | N   | I1381 |
| S18                        | N   | OD2 | D1382 |
|                            | OG  | NZ  | K1380 |
| R23                        | NH1 | O   | E1373 |
|                            |     | O   | S1371 |
|                            | NH2 | O   | E1373 |
| D25                        | OD2 | OH  | Y1378 |
|                            | OD2 | NZ  | K1409 |
| R32                        | NH1 | OD2 | D1471 |
|                            | NH2 | OD1 |       |
| H36                        | NE2 | OD1 | D1382 |
| G43                        | N   | OG  | S1407 |
| N44                        | N   | O   | S1469 |
|                            | ND2 | O   | S1470 |
| R45                        | NH1 | O   | S1411 |
|                            | NH2 | O   | E1414 |

### Supplementary 2.8. Disulphide mapping of the K92 peptide.

Table of intensities and resulting % (by total intensity) for the various peptides linked by a single disulphide bond as identified by Biopharma Finder.

| <b>Cysteine Pairing</b> | <b>Intensity<sup>a</sup></b> | <b>% (by total intensity)</b> |
|-------------------------|------------------------------|-------------------------------|
| Cys23 to Cys9           | 150564035                    | 62.71                         |
| Cys18 to Cys2           | 85987873                     | 35.81                         |
| Cys23 to Cys2           | 2796033                      | 1.16                          |
| Cys23 to Cys23          | 527299                       | 0.22                          |
| Cys18 to Cys9           | 166812                       | 0.07                          |
| Cys23 to Cys18          | 17112                        | 0.01                          |
| Cys2 to Cys2            | 15354                        | 0.01                          |
| Cys18 to Cys18          | 11924                        | 0.00                          |
| Cys2 to Cys9            | 5193                         | 0.00                          |

<sup>a</sup> Sum of intensities of all peptides (containing a single disulphide bond) identified by Biopharma Finder as containing the same paired cysteines.

### Supplementary 2.9. Structural topology of the K92 peptide.

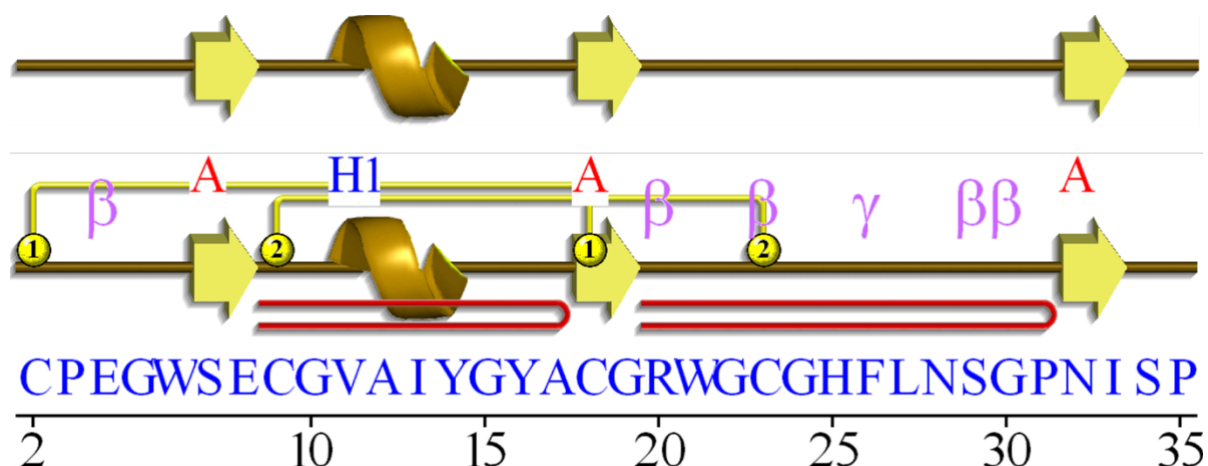

**Supplementary 2.10 Table of hydrogen bonds between K92 and C5.** Hydrogen bonding interactions as defined by the PDBePiSA macromolecular interfaces tool.

| K92                       |     | C5  |      |
|---------------------------|-----|-----|------|
| <i>Hydrogen bonds (8)</i> |     |     |      |
| G22                       | N   | OD1 | N81  |
| H25                       | NE2 | O   | A77  |
| F26                       | N   | O   | F512 |
| I13                       | O   | ND2 | N533 |
| C23                       | O   | ND2 | N38  |
|                           | O   | OG  | S82  |
|                           | N   | OG  | S82  |
| G24                       | O   | N   | F512 |

### Supplementary 2.11. Stacking interactions of K92.

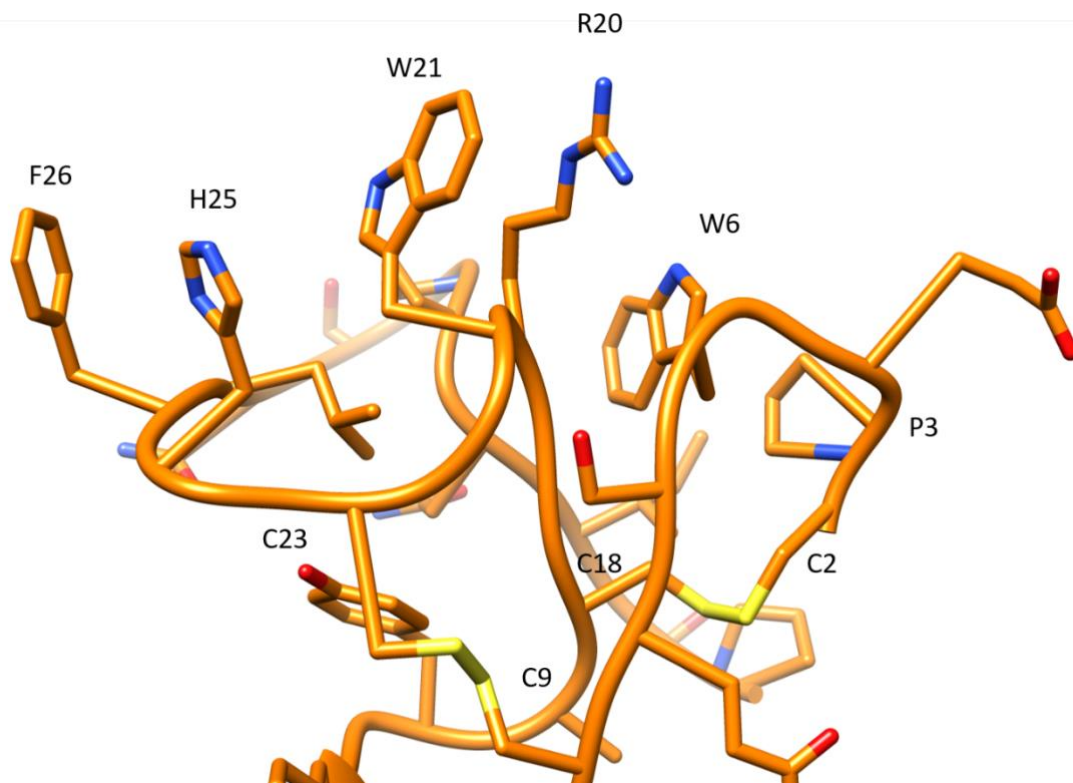

An elegant series of  $\pi$ - $\pi$  and  $\pi$ -aliphatic stacking interactions mark one face of the K92 peptide. The ordering of F26<sub>K92</sub>-H25<sub>K92</sub>-W21<sub>K92</sub>-R20<sub>K92</sub>-W6<sub>K92</sub>-P3<sub>K92</sub> create a hydrophobic face through which decrease the desolvation entropy for hydrogen bonds made from the polar nitrogen of H25<sub>K92</sub> to C5.

**Supplementary 2.12. Individual, total and average hydrogen bond persistence in a binding pose metadynamics simulation of K8-C5**

| <b>HBond K8</b>         | <b>HBond C5</b> | <b>Persistence score</b> |
|-------------------------|-----------------|--------------------------|
| 14:O                    | 1379:H          | 1.000                    |
| 16:H                    | 1379:O          | 0.018                    |
| 16O                     | 1381:H          | 1.000                    |
| 18:H                    | 1382:OD1(OD2)   | 1.000                    |
| 23:HH12(HH11,HH21,HH22) | 1373:O          | 0.355                    |
| 23:HH22(HH11,HH12,HH21) | 1373:O          | 0.355                    |
| 25:OD2(OD1)             | 1378:HH         | 0.964                    |
| 32:HH12(HH11,HH21,HH22) | 1471:OD2(OD1)   | 0.891                    |
| 32:HH22(HH11,HH12,HH21) | 1471:OD2(OD1)   | 0.891                    |
| 43:H                    | 1407:OG         | 0.609                    |
| 44:HD22(HD21)           | 1470:O          | 0.900                    |
|                         | Total:          | 7.98                     |
|                         | Average:        | 0.726                    |

**Supplementary 2.13. Individual, total and average hydrogen bond persistence in a binding pose metadynamics simulation of K92-C5**

| <b>HBond K92</b> | <b>HBond C5</b> | <b>Persistence score</b> |
|------------------|-----------------|--------------------------|
| 13:O             | 533:HD21(HD22)  | 0.909                    |
| 22:H             | 81:OD1          | 0.209                    |
| 23:O             | 38:HD22(HD21)   | 0.536                    |
| 24:O             | 512:H           | 0.536                    |
| 25:HE2           | 80:O            | 0.545                    |
|                  | Total:          | 2.74                     |
|                  | Average:        | 0.547                    |

**Supplementary 2.14. Paratope size.** Comparison of K8 and K92 paratope size to nonredundant antibodies in SAbDab (N= 924). Paratopes were defined as antibody residues within 4.5Å of the antigen in the co-crystal structure.

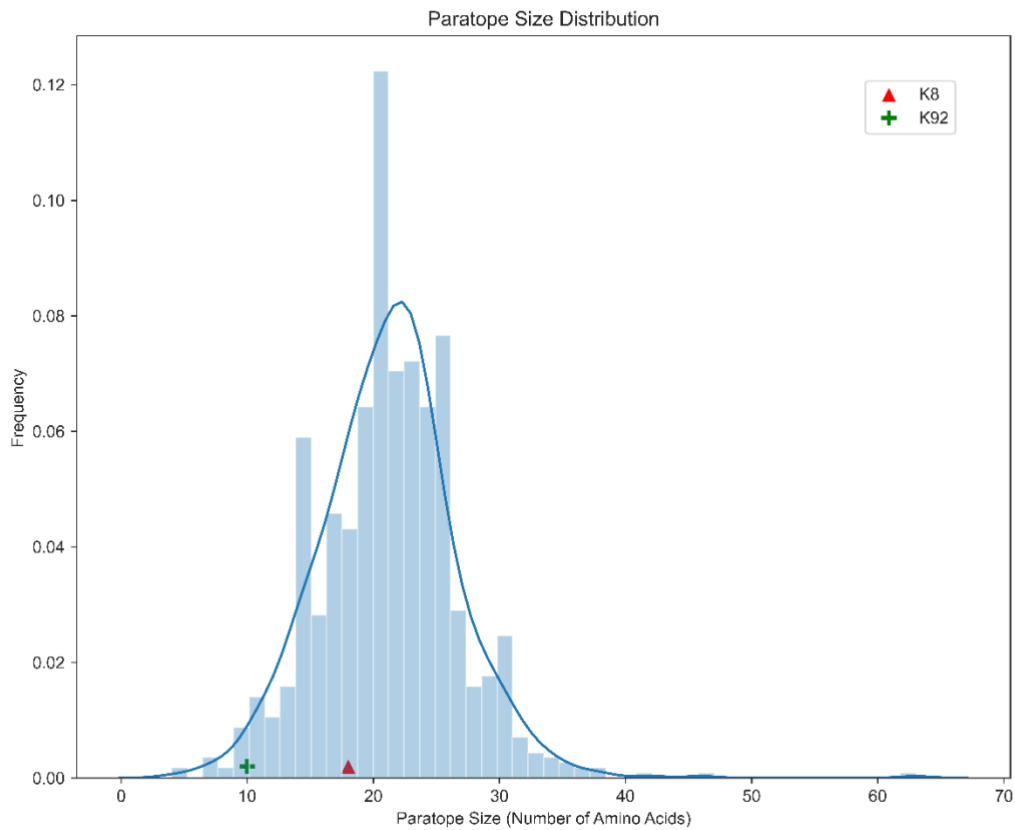



**Supplementary 2.15. Amino acid presence in paratope** (defined as residues 4.5 Å from C5). Comparison of K8 and K92 paratope composition to nonredundant antibodies in SAbDab (n = 924). Paratopes were defined as antibody residues within 4.5Å of the antigen in the co-crystal structure. Error bars of 1x SD are included for SAbDab dataset.

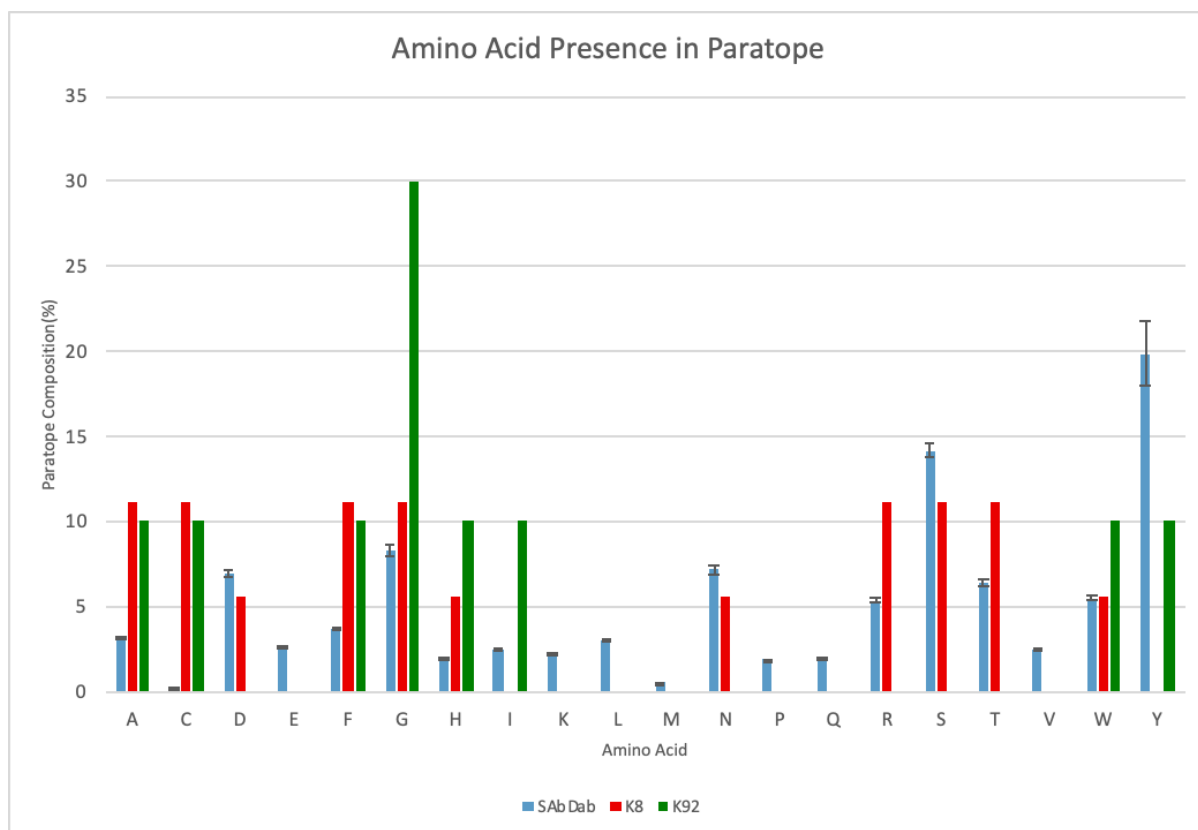

## Supplementary Section 3. Small Angle X-ray Scattering

### Supplementary 3.1. SAXS Summary Data Table

| <b>Data collection parameters</b>               | <b>C5</b>                                     | <b>C5-K8</b> | <b>C5-K57</b> | <b>C5-K92</b> | <b>CK-149:</b> |
|-------------------------------------------------|-----------------------------------------------|--------------|---------------|---------------|----------------|
| Instrument                                      | EMBL P12 (PETRA III, DESY, Hamburg)           |              |               |               |                |
| Beam geometry (mm <sup>2</sup> )                | 0.2×0.12                                      |              |               |               |                |
| Wavelength (nm)                                 | 12.4                                          |              |               |               |                |
| <i>s</i> range (nm <sup>-1</sup> )              | 0.03-7.1                                      |              |               |               |                |
| Temperature (K)                                 | 293                                           |              |               |               |                |
| Concentration range (ml)                        | 5.96                                          |              |               |               |                |
| <b>SEC parameters</b>                           |                                               |              |               |               |                |
| Column                                          | Superdex 200 Increase 5/150 column            |              |               |               |                |
| Buffer                                          | 20mM Tris pH 7.35, 75mM NaCl, and 3% glycerol |              |               |               |                |
| Flow rate, duration                             | 0.35 ml/min; 15 min (900 frames)              |              |               |               |                |
| <b>Structural parameters</b>                    |                                               |              |               |               |                |
| $R_g$ (nm) (from $P(r)$ )                       | 4.8 ± 0.1                                     | 5.4 ± 0.1    | 5.2 ± 0.1     | 5.0 ± 0.1     | 4.9 ± 0.1      |
| $R_g$ (nm) (from Guinier plot)                  | 4.8 ± 0.1                                     | 5.4 ± 0.1    | 5.3 ± 0.1     | 5.1 ± 0.1     | 5.0 ± 0.1      |
| $D_{max}$ (nm)                                  | 17.6 ± 0.5                                    | 18.3 ± 10    | 19 ± 0.5      | 19 ± 0.5      | 18.5 ± 0.5     |
| Porod volume estimate, $V_p$ (nm <sup>3</sup> ) | 390 ± 10                                      | 450 ± 10     | 410 ± 10      | 410 ± 10      | 410 ± 10       |
| <b>Molecular weight determination (kDa)</b>     |                                               |              |               |               |                |
| From volume of correlation, VC                  | 210 ± 20                                      | 240 ± 25     | 230 ± 25      | 220 ± 22      | 220 ± 22       |
| From <i>MALLS</i>                               | 188 ± 9                                       | 200 ± 10     | 199 ± 10      | 197 ± 10      | 195 ± 10       |
| Calculated monomeric <i>MW</i> from sequence    | 186                                           | 192          | 190           | 191.5         | 190            |
| <b>Software employed</b>                        |                                               |              |               |               |                |
| Primary data reduction                          | SASFLOW                                       |              |               |               |                |
| Data processing                                 | CHROMIXS/PRIMUS                               |              |               |               |                |
| Computation of model intensities                | CRYSOL                                        |              |               |               |                |
| normal mode analysis                            | SREFLEX                                       |              |               |               |                |

### Supplementary 3.2 SEC-MALLS and SEC-SAXS chromatograms for C5-knob domain complexes.

SEC-MALLS chromatograms for C5-knob domain complexes show a homogenous molecular weight increase across the elution peak. The SEC-SAXS elution profile collected under identical experimental conditions shows an increase in radius of gyration ( $R_G$ ) for the complexes.

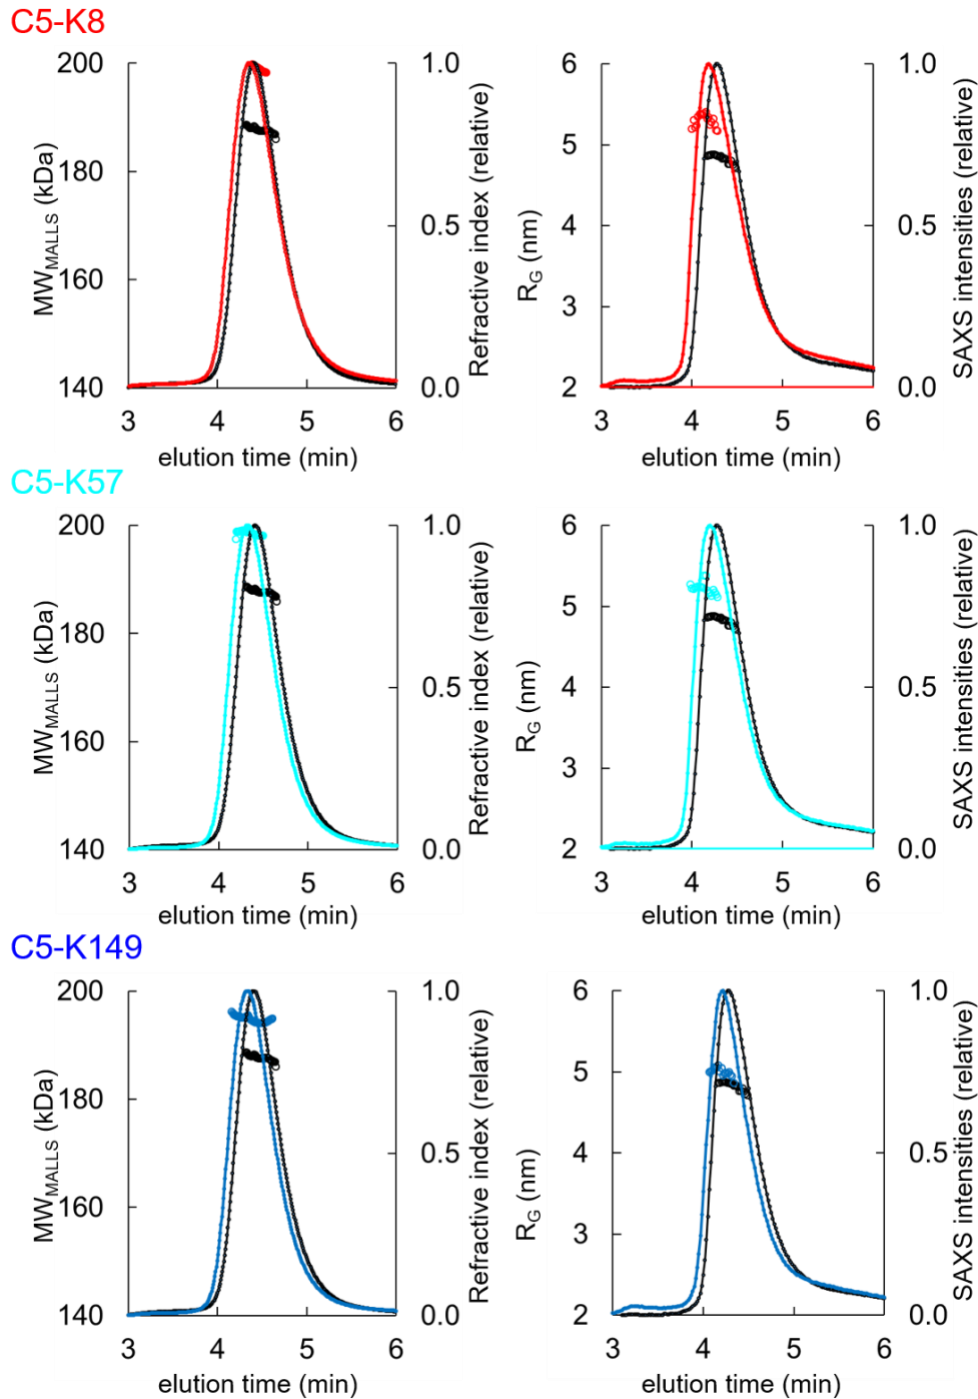

### Supplementary 3.3 Solution structure of complement C5 in apo state.

a) Overlay of cartoon representations of the C5 (red) and the model obtained with SREFLEX (normal mode analysis, blue).

b) Right, the respective fits of the theoretical scattering curves to the SAXS data.  $\chi^2$  values are indicated.

a)

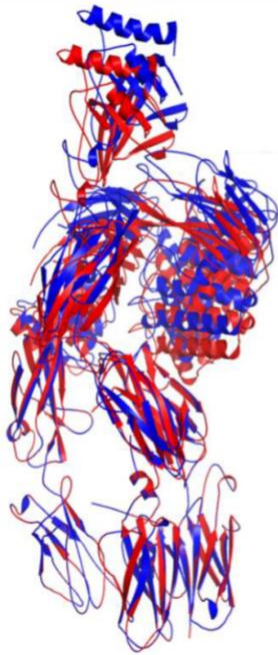

b)

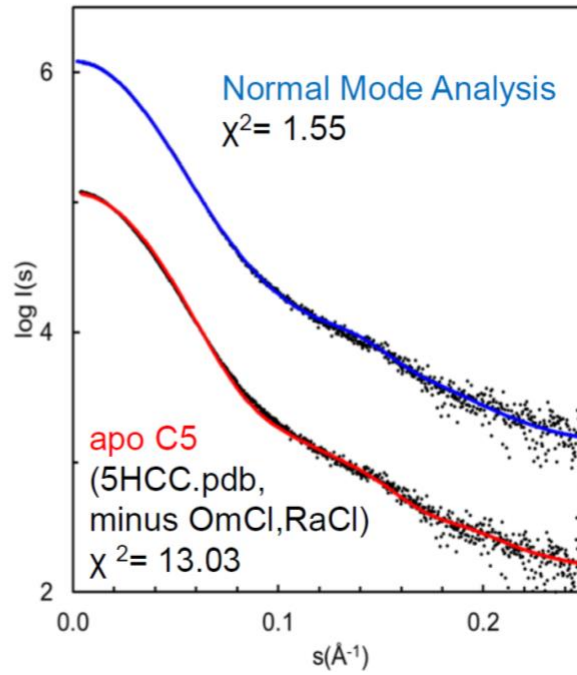

## Supplementary Section 4. HDX-MS

**Supplementary Figure 4.1** Woods plot displaying the differential HDX ( $\Delta$ HDX) for C5 in complex with knob domains (a) K8, (b) K57 and (c) K92 at four detergent exposure time points: 0.5 min, 2 min, 15 min and 1 hr. Blue denotes peptides with decreased HDX and red denotes peptides with increased HDX. 98% confidence intervals are shown as dotted lines.

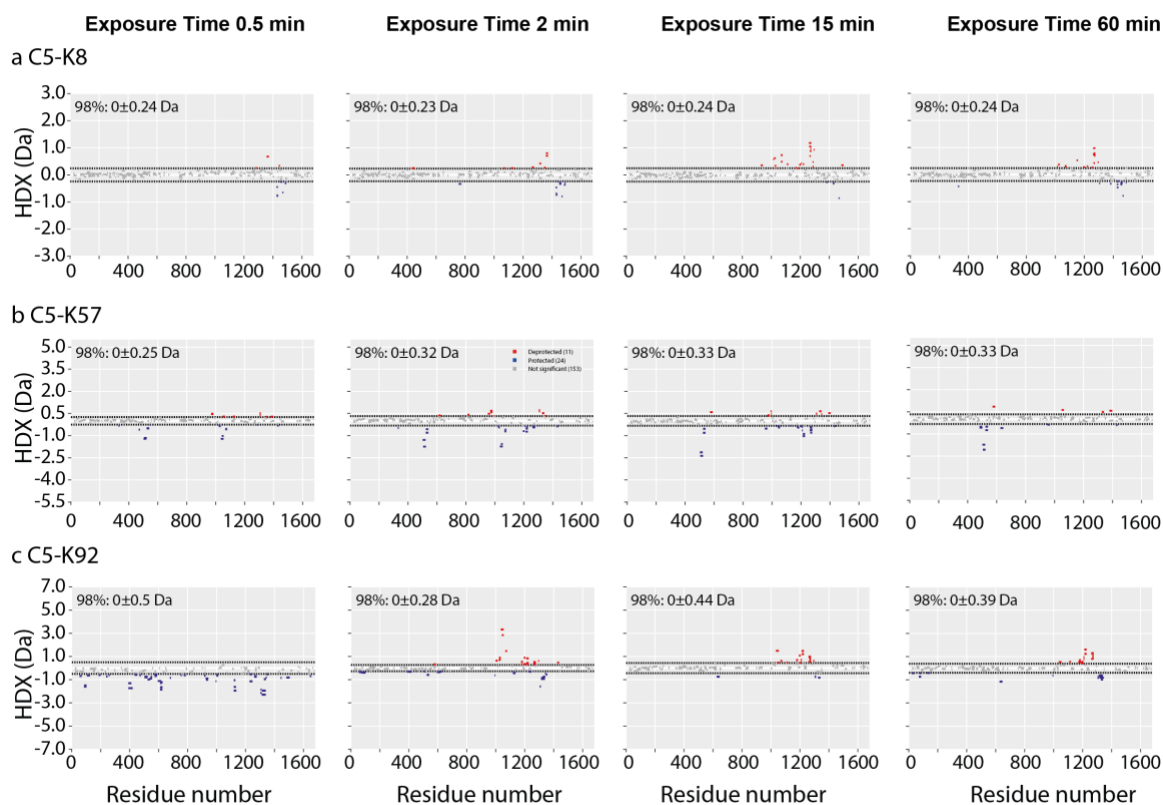



## Supplementary Figure 4.2. Linear coverage map for C5 data in complex with knob domains

(a) K8, (b) K57 and (c) K92.

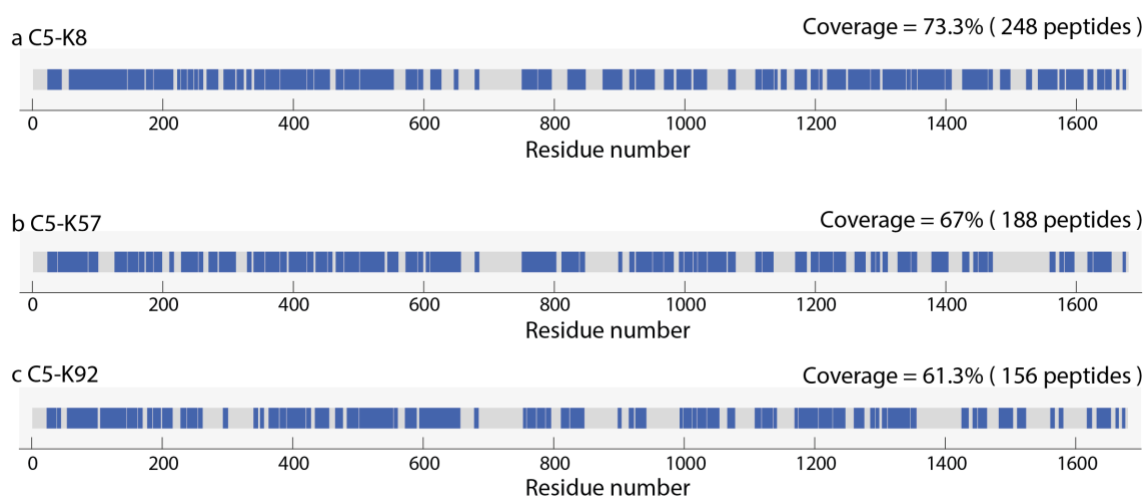

## Supplementary Table 4.3. HDX data summary table for $\Delta$ HDX of C5 in complex with knob domains K8, K57 and K92.

| Data set                                        | $\Delta$ HDX = (C5 + K8) – (C5) | $\Delta$ HDX = (C5 + K57) – (C5) | $\Delta$ HDX = (C5 + K92) – (C5) |
|-------------------------------------------------|---------------------------------|----------------------------------|----------------------------------|
| Protein buffer conditions                       | PBS, pH 7.2                     |                                  |                                  |
| Deuterium time course analysed                  | 30, 120, 900 and 3600 sec       |                                  |                                  |
| Number of peptides                              | 248                             | 188                              | 156                              |
| Sequence coverage                               | 73.3 %                          | 67.0 %                           | 61.3 %                           |
| Redundancy                                      | 2.43                            | 2.10                             | 2.43                             |
| Replicates                                      | Triplicates                     |                                  |                                  |
| Average standard deviation                      | 0.06                            | 0.08                             | 0.09                             |
| Significant differences at 1 hour $\Delta$ HDX* | CI 98% = $0 \pm 24$ Da          | CI 98% = $0 \pm 33$ Da           | CI 98% = $0 \pm 39$ Da           |

\* To compare significant differences, a T-test with  $\alpha=0.02$  was used. Only peptides which satisfied a  $\Delta$ HDX confidence interval of 98 % were considered significant.

## Supplementary 5.1 SPR single-cycle kinetics of knob domains binding to human C5b

**Data Table (summary of  $n=3$ )**

|      | Chi <sup>2</sup><br>(RU <sup>2</sup> ) | mean $k_{on}$<br>(1/Ms) | mean $k_{off}$<br>(1/s) | mean $K_D$<br>(M) | Mean<br>stoichiometric<br>ratio | comment     |
|------|----------------------------------------|-------------------------|-------------------------|-------------------|---------------------------------|-------------|
| K8   | -                                      | -                       | -                       | -                 | 0.1                             | Non-binding |
| K92  | 0.04                                   | 1.14E+05                | 6.20E-05                | 5.48E-10          | 0.4                             |             |
| K57  | 0.07                                   | 2.51E+05                | 3.54E-04                | 1.41E-09          | 0.4                             |             |
| K149 | 0.03                                   | 7.49E+05                | 3.76E-03                | 5.02E-09          | 0.4                             |             |

$n=1$

|      | Chi <sup>2</sup><br>(RU <sup>2</sup> ) | $k_{on}$<br>(1/Ms) | $k_{off}$ (1/s) | $K_D$ (M) | Rmax<br>(RU) | Stoichiometric<br>ratio | comment     |
|------|----------------------------------------|--------------------|-----------------|-----------|--------------|-------------------------|-------------|
| K8   | -                                      | -                  | -               | -         | 2.1          | 0.1                     | Non-binding |
| K92  | 0.06                                   | 1.11E+05           | 5.20E-05        | 4.67E-10  | 5.4          | 0.4                     |             |
| K57  | 0.05                                   | 2.73E+05           | 3.75E-04        | 1.37E-09  | 6.2          | 0.4                     |             |
| K149 | 0.03                                   | 7.56E+05           | 3.65E-03        | 4.83E-09  | 2.8          | 0.3                     |             |

$n=2$

|      | Chi <sup>2</sup><br>(RU <sup>2</sup> ) | $k_{on}$ (1/Ms) | $k_{off}$ (1/s) | $K_D$ (M) | Rmax<br>(RU) | Stoichiometric<br>ratio | comment     |
|------|----------------------------------------|-----------------|-----------------|-----------|--------------|-------------------------|-------------|
| K8   | -                                      | -               | -               | -         | 2.4          | 0.1                     | Non-binding |
| K92  | 0.03                                   | 1.10E+05        | 7.68E-05        | 6.99E-10  | 5.2          | 0.4                     |             |
| K57  | 0.08                                   | 2.40E+05        | 3.46E-04        | 1.44E-09  | 8.2          | 0.4                     |             |
| k149 | 0.03                                   | 7.80E+05        | 3.99E-03        | 5.11E-09  | 5.1          | 0.4                     |             |

$n=3$

|      | Chi <sup>2</sup><br>(RU <sup>2</sup> ) | $k_{on}$ (1/Ms) | $k_{off}$ (1/s) | $K_D$ (M) | Rmax<br>(RU) | Stoichiometric<br>ratio | comment     |
|------|----------------------------------------|-----------------|-----------------|-----------|--------------|-------------------------|-------------|
| K8   | -                                      | -               | -               | -         | 2.6          | 0.2                     | Non-binding |
| K92  | 0.03                                   | 1.20E+05        | 5.73E-05        | 4.78E-10  | 4.7          | 0.3                     |             |
| K57  | 0.08                                   | 2.38E+05        | 3.42E-04        | 1.43E-09  | 7.9          | 0.4                     |             |
| K149 | 0.03                                   | 7.12E+05        | 3.65E-03        | 5.13E-09  | 5.2          | 0.4                     |             |

**Supplementary Figure 5.2 SPR single-cycle kinetics of knob domains binding to human C5b.** Example sensorgrams and curve fits (1:1 binding model) are shown with summary kinetics from  $n=3$  experiments.

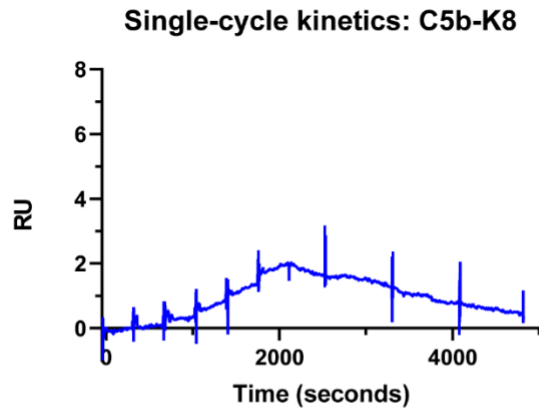

Stoichiometric ratio at  $1\mu\text{M}$  = 0.1  
Non-binding

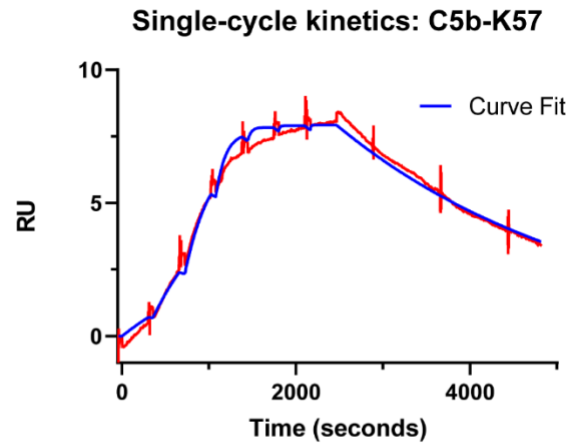

mean  $k_{\text{on}} = 2.51 \times 10^5$  1/Ms  
mean  $k_{\text{off}} = 3.54 \times 10^{-4}$  1/s  
mean  $K_D = 1.41 \times 10^{-9}$  M  
mean stoichiometric ratio at  $1\mu\text{M}$  = 0.4

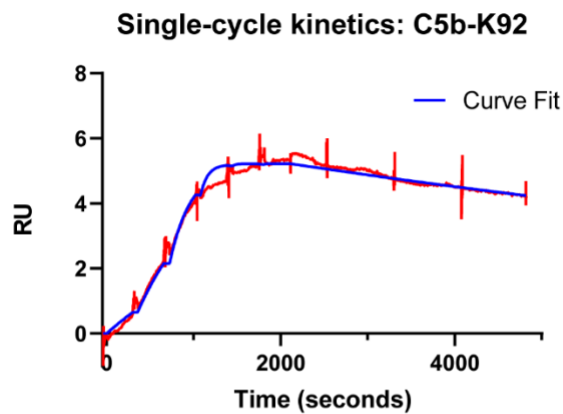

mean  $k_{\text{on}} = 1.14 \times 10^5$  1/Ms  
mean  $k_{\text{off}} = 6.20 \times 10^{-5}$  1/s  
mean  $K_D = 5.48 \times 10^{-10}$  M  
mean stoichiometric ratio at  $1\mu\text{M}$  = 0.4

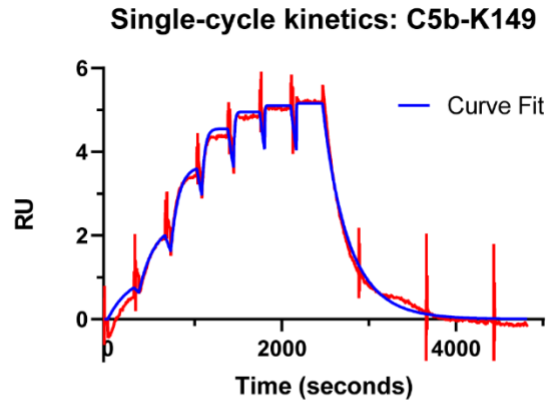

mean  $k_{\text{on}} = 7.49 \times 10^5$  1/Ms  
mean  $k_{\text{off}} = 3.76 \times 10^{-3}$  1/s  
mean  $K_D = 5.02 \times 10^{-9}$  M  
mean stoichiometric ratio at  $1\mu\text{M}$  = 0.4
